# Supplementary material for: TEPAPA: a novel in silico feature learning pipeline for mining prognostic and associative factors from text-based electronic medical records
Source: PubMed Central journal article supplement (PMC5537364; doi:10.1038/s41598-017-07111-0), 2017-07-31

## Supplementary Material

### TEPAPA: a novel *in silico* feature learning pipeline for mining prognostic and associative factors from text-based electronic medical records

Frank Lin <sup>1,2\*</sup>, Adrian Pokorny <sup>3</sup>, Christina Teng <sup>4</sup>, Richard J Epstein <sup>1,2</sup>

<sup>1</sup> Department of Oncology, St Vincent's Hospital & The Kinghorn Cancer Centre, NSW, Australia

<sup>2</sup> Garvan Institute of Medical Research, Darlinghurst NSW Australia

<sup>3</sup> The Chris O'Brien Lifehouse, Sydney, Camperdown, NSW Australia

<sup>4</sup> Department of Medical Oncology, Liverpool Hospital, NSW Australia

\* Corresponding author

#### List of contents

**Table S1.** Characteristics of the corpus used in main study

**Table S2.** Full list of features listed mined by TEPAPA (MDT reports)

**Table S3.** Full list of features listed mined by TEPAPA (Anatomy pathology reports)

**Table S4.** Full list of features listed mined by TEPAPA (FDG PET/CT reports)

**Table S5.** Full list of features mined by TEPAPA – other variables

**Table S6.** Numeric features mined by TEPAPA

**Table S7.** Relative computational time by type of features included

**Figure S8.** Average predictive performance by classifier and feature filtering threshold

**Table S1.** Characteristics of the corpus used in the main study

| Variable          | Metric   | Corpus type          |                                           |                                        |                                       |                         |
|-------------------|----------|----------------------|-------------------------------------------|----------------------------------------|---------------------------------------|-------------------------|
|                   |          | MDT Report<br>(N=77) | Medical oncology clinic Letters<br>(N=14) | Anatomical pathology reports<br>(N=75) | FDG-PET & Radiology reports<br>(N=74) | All inclusive<br>(N=82) |
| HPV/P16 status    | Positive | 46 (60%)             | 6 (43%)                                   | 45 (60%)                               | 45 (61%)                              | 50 (61%)                |
| File size (lines) | corpus   | 5,106                | 1,220                                     | 22,312                                 | 10,588                                | 77,278                  |
|                   | Per case | 66                   | 87                                        | 298                                    | 143                                   | 942                     |
| File size (bytes) | corpus   | 146,112              | 47,795                                    | 870,635                                | 399,482                               | 2,727,529               |
|                   | Per case | 1,898                | 3,414                                     | 11,609                                 | 5,398                                 | 33,263                  |
| Words             | corpus   | 21,879               | 6,850                                     | 125,352                                | 57,390                                | 373,539                 |
|                   | Per case | 284                  | 489                                       | 1,671                                  | 776                                   | 4,555                   |

Note: MDT: Multidisciplinary meeting.

**Table S2.** Full list of features listed mined by TEPAPA (MDT reports)**Table S2(a):** Positive binary features (n-gram) without sequence-level annotation

| Log (OR) | P                    | N  | Pattern                       | Comments                  | Crossref. |
|----------|----------------------|----|-------------------------------|---------------------------|-----------|
| 2.35     | 4.1×10 <sup>-5</sup> | 32 | <b>base of</b>                | SITE (Type IIIB MD)       | (S2a.1)   |
| 3.13     | 0.0012               | 12 | <b>the right tonsil</b>       | SITE                      | (S2a.2)   |
| 3.02     | 0.0023               | 11 | <b>M0 ,</b>                   | STAGE                     | (S2a.3)   |
| 1.74     | 0.0029               | 25 | <b>positive</b>               | HPV STATUS (Type IIIB MD) | (S2a.4)   |
| 2.90     | 0.0046               | 10 | <b>glossotonsillar sulcus</b> | SITE                      | (S2a.5)   |

**Table S2(b):** Positive binary features (n-gram) with sequence-level annotation using UMLS vocabulary

| Log (OR) | P                    | N  | Pattern                 | Comments                  | Crossref. |
|----------|----------------------|----|-------------------------|---------------------------|-----------|
| 2.35     | 4.1×10 <sup>-5</sup> | 32 | <b>base of tongue</b>   | SITE                      | (S2b.1)   |
| 2.08     | 0.00027              | 29 | <b>positive</b>         | HPV STATUS (Type IIIB MD) | (S2b.2)   |
| 3.13     | 0.0012               | 12 | <b>the right tonsil</b> | SITE                      | (S2b.3)   |
| 3.13     | 0.0012               | 12 | <b>sulcus</b>           | SITE (Type IIIB MD)       | (S2b.4)   |

**Table S2(c):** Positive binary features (regular expressions) without sequence-level annotation

| Log (OR) | P                    | N  | Pattern                                                                                            | Comments            | Crossref. |
|----------|----------------------|----|----------------------------------------------------------------------------------------------------|---------------------|-----------|
| 2.41     | 7.5×10 <sup>-5</sup> | 28 | <b>the (right left)? base of</b>                                                                   | SITE (Type IIIB MD) | (S2c.1)   |
| 2.32     | 0.0001               | 27 | <b>the (right left)? base of tongue</b>                                                            | SITE                | (S2c.2)   |
| 2.59     | 0.00011              | 24 | <b>of the (right left)? base</b>                                                                   | SITE (Type IIIB MD) | (S2c.3)   |
| 2.00     | 0.00059              | 28 | <b>of the (right left)? (base floor) of</b>                                                        | SITE (Type IIIB MD) | (S2c.4)   |
| 2.32     | 0.00064              | 21 | <b>base of (tongue tongue.glossotonsillar sulcus) which crosses midline? .</b>                     | SITE                | (S2c.5)   |
| 2.77     | 0.00075              | 17 | <b>the (right left) base</b>                                                                       | SITE (Type IIIB MD) | (S2c.6)   |
| 2.06     | 0.00094              | 24 | <b>irradiation (and with) (or without concurrent) chemotherapy</b>                                 | MANAGEMENT          | (S2c.7)   |
| 2.06     | 0.00094              | 24 | <b>of (tongue subclavicular disease)? (which crosses midline tongue.glossotonsillar sulcus)? .</b> | SITE                | (S2c.8)   |
| 3.13     | 0.0012               | 12 | <b>SCC of the right (tonsil base of tongue glossotonsillar sulcus) -</b>                           | SITE                | (S2c.9)   |
| 1.91     | 0.0013               | 27 | <b>of the (right left)? base of? tongue</b>                                                        | SITE                | (S2c.10)  |
| 2.68     | 0.0015               | 16 | <b>SCC of the (right left)? base of tongue</b>                                                     | SITE                | (S2c.11)  |
| 2.57     | 0.0029               | 15 | <b>SCC of the (right left) tonsil</b>                                                              | SITE                | (S2c.12)  |
| 2.57     | 0.0029               | 15 | <b>the left? base of tongue .</b>                                                                  | SITE                | (S2c.13)  |
| 1.88     | 0.004                | 22 | <b>irradiation (and with) concurrent</b>                                                           | MANAGEMENT          | (S2c.14)  |
| 2.77     | 0.0092               | 9  | <b>the (right left)? glossotonsillar sulcus</b>                                                    | SITE                | (S2c.15)  |
| 2.77     | 0.0092               | 9  | <b>right (tonsil IIA base of tongue) ,</b>                                                         | SITE                | (S2c.16)  |
| 2.77     | 0.0092               | 9  | <b>, p16? positive , ? HPV? positive</b>                                                           | HPV STATUS          | (S2c.17)  |
| 2.77     | 0.0092               | 9  | <b>involving the (right left)? base</b>                                                            | SITE (Type IIIB MD) | (S2c.18)  |

**Table S2.** Full list of features listed mined by TEPAPA (MDT reports) (Cont'd)**Table S2(d):** Positive binary features (regular expressions) with sequence-level annotation using UMLS vocabulary

| Log (OR) | P       | N  | Pattern                                                                 | Comments    | Crossref. |
|----------|---------|----|-------------------------------------------------------------------------|-------------|-----------|
| 2.59     | 0.00011 | 24 | of the (right left)? base of tongue                                     | SITE        | (S2d.1)   |
| 2.77     | 0.00075 | 17 | the (right left) base of tongue                                         | SITE        | (S2d.2)   |
| 2.06     | 0.00094 | 24 | irradiation (and with) (or without concurrent) chemotherapy             | MANAGEMENT  | (S2d.3)   |
| 3.23     | 0.0011  | 13 | SCC of the right (tonsil base of tongue glossotonsillar sulcus) -       | SITE        | (S2d.4)   |
| 2.68     | 0.0015  | 16 | SCC of the (right left)? base of tongue                                 | SITE        | (S2d.5)   |
| 2.57     | 0.0029  | 15 | the (level II left glossotonsillar sulcus base of tongue left tonsil) - | NODAL, SITE | (S2d.6)   |
| 1.88     | 0.004   | 22 | irradiation (and with) concurrent                                       | MANAGEMENT  | (S2d.7)   |
| 2.77     | 0.0092  | 9  | the (right left)? glossotonsillar sulcus                                | SITE        | (S2d.8)   |
| 2.77     | 0.0092  | 9  | right (tonsil IIA base of tongue) ,                                     | SITE        | (S2d.9)   |
| 2.77     | 0.0092  | 9  | , p16? positive ,? HPV? positive                                        | HPV STATUS  | (S2d.10)  |
| 2.77     | 0.0092  | 9  | involving the (right left)? base of tongue                              | SITE        | (S2d.11)  |

**Table S2(e):** Negative binary features (n-gram) without sequence-level annotation

| Log (OR) | P      | N  | Pattern                | Comments        | Crossref. |
|----------|--------|----|------------------------|-----------------|-----------|
| -3.35    | 0.0011 | 7  | management             |                 | (S2e.1)   |
| -2.75    | 0.0024 | 9  | than                   |                 | (S2e.2)   |
| -2.75    | 0.0024 | 9  | radiation therapy .    | MANAGEMENT      | (S2e.3)   |
| -2.75    | 0.0024 | 9  | larynx                 | SITE            | (S2e.4)   |
| -3.17    | 0.0031 | 6  | SCC of the oral tongue | SITE            | (S2e.5)   |
| -3.17    | 0.0031 | 6  | disease with           |                 | (S2e.6)   |
| -3.17    | 0.0031 | 6  | supportive care        | MANAGEMENT      | (S2e.7)   |
| -2.57    | 0.0061 | 8  | less                   |                 | (S2e.8)   |
| -2.57    | 0.0061 | 8  | tissues                |                 | (S2e.9)   |
| -2.57    | 0.0061 | 8  | posterior              | TUMOUR LOCATION | (S2e.10)  |
| -2.57    | 0.0061 | 8  | of his                 |                 | (S2e.11)  |
| -1.75    | 0.0068 | 15 | anterior               | TUMOUR LOCATION | (S2e.12)  |
| -2.96    | 0.0086 | 5  | MRI scan shows         |                 | (S2e.13)  |
| -2.96    | 0.0086 | 5  | care .                 |                 | (S2e.14)  |
| -2.96    | 0.0086 | 5  | is currently           |                 | (S2e.15)  |
| -2.96    | 0.0086 | 5  | laryngeal              |                 | (S2e.16)  |
| -2.96    | 0.0086 | 5  | partial                |                 | (S2e.17)  |
| -2.96    | 0.0086 | 5  | progressive            |                 | (S2e.18)  |

**Table S2.** Full list of features listed mined by TEPAPA (MDT reports) (Cont'd)**Table S2(f):** Negative binary features (n-gram) with sequence-level annotation using UMLS vocabulary

| Log (OR) | P       | N  | Pattern         | Comments        | Crossref. |
|----------|---------|----|-----------------|-----------------|-----------|
| -2.91    | 0.00089 | 10 | oral tongue     | SITE            | (S2f.1)   |
| -3.35    | 0.0011  | 7  | management      |                 | (S2f.2)   |
| -3.35    | 0.0011  | 7  | supportive care | MANAGEMENT      | (S2f.3)   |
| -2.75    | 0.0024  | 9  | larynx          | SITE            | (S2f.4)   |
| -2.57    | 0.0061  | 8  | Anterior        | TUMOUR LOCATION | (S2f.5)   |
| -2.57    | 0.0061  | 8  | posterior       | TUMOUR LOCATION | (S2f.6)   |
| -2.96    | 0.0086  | 5  | MRI scan shows  |                 | (S2f.7)   |
| -2.96    | 0.0086  | 5  | grade           |                 | (S2f.8)   |
| -2.96    | 0.0086  | 5  | is currently    |                 | (S2f.9)   |

**Table S2(g):** Negative binary features (regular expressions) without sequence-level annotation

| Log (OR) | P       | N  | Pattern                                                                                                                                                                                                                  | Comments                                                                                  | Crossref. |
|----------|---------|----|--------------------------------------------------------------------------------------------------------------------------------------------------------------------------------------------------------------------------|-------------------------------------------------------------------------------------------|-----------|
| -3.52    | 0.00037 | 8  | SCC of the left? oral                                                                                                                                                                                                    | SITE (Type IIIB MD)                                                                       | (S2g.1)   |
| -2.91    | 0.00089 | 10 | the (right left)? oral tongue                                                                                                                                                                                            | SITE                                                                                      | (S2g.2)   |
| -2.91    | 0.00089 | 10 | a (locally locoregionally)? (p16 negative advanced) SCC                                                                                                                                                                  | HPV STATUS                                                                                | (S2g.3)   |
| -3.35    | 0.0011  | 7  | SCC of the supraglottic? larynx                                                                                                                                                                                          | SITE                                                                                      | (S2g.4)   |
| -1.83    | 0.0013  | 21 | and (in excellent general health neck dissection nondrinker well review adjuvant radiation therapy base of tongue dyslipidaemia dysphagia for solids gastro-oesophageal reflux disease retromolar trigone IV ramipril) . | Mixed concept: COMORBIDITY, MANAGEMENT, PERFORMANCE STATUS, SITE, SOCIAL HISTORY, SYMPTOM | (S2g.5)   |
| -2.75    | 0.0024  | 9  | SCC of the left? oral? tongue                                                                                                                                                                                            | SITE                                                                                      | (S2g.6)   |
| -3.17    | 0.0031  | 6  | SCC of the supraglottic? (lower lip larynx) .                                                                                                                                                                            | SITE                                                                                      | (S2g.7)   |
| -1.43    | 0.0051  | 39 | is (a restored dentition with palliative intent SCC on biopsy mobile normal poor 100 g daily edentulous clinically clear known to the unit required intact) .                                                            | Mixed concept: MANAGEMENT, ORAL HYGIENE, SOCIAL HISTORY                                   | (S2g.8)   |
| -1.49    | 0.0052  | 23 | He has? (will require been works as)? a                                                                                                                                                                                  |                                                                                           | (S2g.9)   |
| -2.96    | 0.0086  | 5  | likely to? require adjuvant radiation therapy                                                                                                                                                                            | MANAGEMENT                                                                                | (S2g.10)  |
| -2.96    | 0.0086  | 5  | the supraglottic? larynx .                                                                                                                                                                                               | SITE                                                                                      | (S2g.11)  |

Abbreviations: MD: Misdiscovery

**Table S2.** Full list of features listed mined by TEPAPA (MDT reports) (Cont'd)

**Table S2(h):** Negative binary features (regular expressions) with sequence-level annotation using UMLS vocabulary

| Log (OR) | P       | N  | Pattern                                                                                                                                                                                                                      | Comments                                                                   | Crossref. |
|----------|---------|----|------------------------------------------------------------------------------------------------------------------------------------------------------------------------------------------------------------------------------|----------------------------------------------------------------------------|-----------|
| -3.52    | 0.00037 | 8  | <b>SCC of the left? oral tongue</b>                                                                                                                                                                                          | SITE                                                                       | (S2h.1)   |
| -3.52    | 0.00037 | 8  | <b>SCC of the supraglottic? (oral tongue larynx lower lip) .</b>                                                                                                                                                             | SITE                                                                       | (S2h.2)   |
| -2.91    | 0.00089 | 10 | <b>a (locally locoregionally)? (p16 negative advanced) SCC</b>                                                                                                                                                               | HPV STATUS                                                                 | (S2h.3)   |
| -1.91    | 0.001   | 19 | <b>and (in excellent general health neck dissection nondrinker review adjuvant radiation therapy base of tongue dyslipidaemia dysphagia for solids gastro - oesophageal reflux disease retromolar trigone IV ramipril) .</b> | COMORBIDITY, MANAGEMENT, PERFORMANCE STATUS, SITE, SOCIAL HISTORY, SYMPTOM | (S2h.4)   |
| -3.35    | 0.0011  | 7  | <b>SCC of the supraglottic? larynx</b>                                                                                                                                                                                       | SITE                                                                       | (S2h.5)   |
| -2.75    | 0.0024  | 9  | <b>left (neck level II otalgia level 1 cheek) .</b>                                                                                                                                                                          | NODAL                                                                      | (S2h.6)   |
| -1.42    | 0.0048  | 34 | <b>is (a restored dentition with palliative intent SCC on biopsy mobile generally fit and well poor 100 g daily edentulous clinically clear known to the unit required) .</b>                                                | MANAGEMENT, ORAL HYGIENE, PERFORMANCE STATUS, SOCIAL HISTORY               | (S2h.7)   |
| -2.57    | 0.0061  | 8  | <b>the left (neck level II level 1 cheek) .</b>                                                                                                                                                                              | NODAL                                                                      | (S2h.8)   |
| -2.96    | 0.0086  | 5  | <b>likely to? require adjuvant radiation therapy</b>                                                                                                                                                                         | MANAGEMENT                                                                 | (S2h.9)   |
| -2.96    | 0.0086  | 5  | <b>the supraglottic? larynx .</b>                                                                                                                                                                                            | SITE                                                                       | (S2h.10)  |

Note: In Tables S2(c), (d), (g), and (h), regular expressions that group only cardinal numbers as options [e.g. "size (15|20|30|...) mm" ] are not shown for brevity.

**Table S3:** Full list of features listed mined by TEPAPA (Pathology reports)**Table S3(a):** Positive binary features (n-gram) without sequence-level annotation

| Log (OR) | P                    | N  | Pattern                             | Comments                  | Crossref. |
|----------|----------------------|----|-------------------------------------|---------------------------|-----------|
| 3.68     | 4.5×10 <sup>-7</sup> | 27 | : Positive                          | HPV STATUS (Type IIIB MD) | (S3a.1)   |
| 3.14     | 7.6×10 <sup>-7</sup> | 30 | tonsillar                           | SITE                      | (S3a.2)   |
| 3.04     | 2.1×10 <sup>-6</sup> | 29 | tongue base                         | SITE                      | (S3a.3)   |
| 3.41     | 7.7×10 <sup>-6</sup> | 24 | tonsil                              | SITE                      | (S3a.4)   |
| 3.62     | 4.3×10 <sup>-5</sup> | 17 | positive .                          |                           | (S3a.5)   |
| 3.14     | 5.6×10 <sup>-5</sup> | 21 | HPV related                         | HPV STATUS                | (S3a.6)   |
| 3.53     | 9.3×10 <sup>-5</sup> | 16 | indicate                            |                           | (S3a.7)   |
| 3.53     | 9.3×10 <sup>-5</sup> | 16 | Positive .                          |                           | (S3a.8)   |
| 2.87     | 0.00062              | 18 | Specimen 9 : Labelled " left        |                           | (S3a.9)   |
| 2.06     | 0.00091              | 24 | : HPV                               | HPV STATUS (Type IIIB MD) | (S3a.10)  |
| 2.23     | 0.0013               | 20 | lymphoid tissue                     |                           | (S3a.11)  |
| 1.54     | 0.0023               | 39 | carcinoma in                        |                           | (S3a.12)  |
| 3.01     | 0.0024               | 11 | Clinical Information : R            |                           | (S3a.13)  |
| 2.89     | 0.0047               | 10 | HPV associated                      |                           | (S3a.14)  |
| 2.89     | 0.0047               | 10 | of the largest                      |                           | (S3a.15)  |
| 2.89     | 0.0047               | 10 | , non-keratinising                  | PATHOLOGY FEATURE         | (S3a.16)  |
| 2.89     | 0.0047               | 10 | tumour " , the specimen consists of |                           | (S3a.17)  |
| 2.47     | 0.0057               | 14 | ( 0/10                              |                           | (S3a.18)  |
| 2.47     | 0.0057               | 14 | related .                           |                           | (S3a.19)  |
| 2.76     | 0.0093               | 9  | x 30 x 10 mm .                      |                           | (S3a.20)  |
| 2.76     | 0.0093               | 9  | pharyngeal                          |                           | (S3a.21)  |
| 2.76     | 0.0093               | 9  | oropharyngectomy :                  |                           | (S3a.22)  |
| 2.76     | 0.0093               | 9  | associated squamous cell carcinoma  |                           | (S3a.23)  |
| 2.76     | 0.0093               | 9  | Right oropharyngectomy              |                           | (S3a.24)  |
| 1.33     | 0.0099               | 34 | dimension                           |                           | (S3a.25)  |

**Table S3:** Full list of features listed mined by TEPAPA (Pathology reports) – (Cont'd)**Table S3(b):** Positive binary features (n-gram) with sequence-level annotation using UMLS vocabulary

| Log (OR) | P                    | N  | Pattern                                        | Comments                     | Crossref. |
|----------|----------------------|----|------------------------------------------------|------------------------------|-----------|
| 3.68     | 4.5×10 <sup>-7</sup> | 27 | <b>: Positive</b>                              | HPV STATUS<br>(Type IIIB MD) | (S3b.1)   |
| 3.04     | 2.1×10 <sup>-6</sup> | 29 | <b>tongue base</b>                             | SITE                         | (S3b.2)   |
| 3.32     | 2×10 <sup>-5</sup>   | 23 | <b>tonsillar</b>                               | SITE                         | (S3b.3)   |
| 3.23     | 2.5×10 <sup>-5</sup> | 22 | <b>tonsil</b>                                  | SITE                         | (S3b.4)   |
| 3.62     | 4.3×10 <sup>-5</sup> | 17 | <b>positive .</b>                              |                              | (S3b.5)   |
| 3.14     | 5.6×10 <sup>-5</sup> | 21 | <b>HPV related</b>                             | HPV STATUS                   | (S3b.6)   |
| 3.53     | 9.3×10 <sup>-5</sup> | 16 | <b>Positive .</b>                              |                              | (S3b.7)   |
| 3.53     | 9.3×10 <sup>-5</sup> | 16 | <b>indicate</b>                                |                              | (S3b.8)   |
| 2.87     | 0.00062              | 18 | <b>Specimen 9 : Labelled " left</b>            |                              | (S3b.9)   |
| 2.06     | 0.00091              | 24 | <b>: HPV</b>                                   | HPV STATUS<br>(Type IIIB MD) | (S3b.10)  |
| 3.01     | 0.0024               | 11 | <b>, non</b>                                   |                              | (S3b.11)  |
| 3.01     | 0.0024               | 11 | <b>Clinical Information : R</b>                |                              | (S3b.12)  |
| 2.89     | 0.0047               | 10 | <b>tumour " , the specimen consists<br/>of</b> |                              | (S3b.13)  |
| 2.89     | 0.0047               | 10 | <b>HPV associated</b>                          |                              | (S3b.14)  |
| 2.89     | 0.0047               | 10 | <b>of the largest</b>                          |                              | (S3b.15)  |
| 1.65     | 0.0055               | 24 | <b>Metastatic</b>                              |                              | (S3b.16)  |
| 2.47     | 0.0057               | 14 | <b>( 0/ 10</b>                                 |                              | (S3b.17)  |
| 2.47     | 0.0057               | 14 | <b>related .</b>                               |                              | (S3b.18)  |
| 2.76     | 0.0093               | 9  | <b>oropharyngectomy :</b>                      |                              | (S3b.19)  |
| 2.76     | 0.0093               | 9  | <b>x 30 x 10 mm .</b>                          |                              | (S3b.20)  |
| 2.76     | 0.0093               | 9  | <b>Right oropharyngectomy</b>                  |                              | (S3b.21)  |
| 2.76     | 0.0093               | 9  | <b>base of tongue</b>                          | SITE                         | (S3b.22)  |
| 2.76     | 0.0093               | 9  | <b>tonsillar lymphoid tissue</b>               | SITE                         | (S3b.23)  |
| 1.33     | 0.0099               | 34 | <b>dimension</b>                               |                              | (S3b.24)  |



**Table S3:** Full list of features listed mined by TEPAPA (Pathology reports) – (Cont'd)

**Table S3(c):** Positive binary features (regular expressions) without sequence-level annotation

| Log (OR) | P                    | N  | Pattern                                                                                                                                                                                                                                             | Comments                                          | Crossref. |
|----------|----------------------|----|-----------------------------------------------------------------------------------------------------------------------------------------------------------------------------------------------------------------------------------------------------|---------------------------------------------------|-----------|
| 3.50     | 3×10 <sup>-6</sup>   | 25 | HPV (studies genotypes status) :? P16 immunohistochemistry :? Positive                                                                                                                                                                              | HPV STATUS                                        | (S3c.1)   |
| 3.89     | 6.2×10 <sup>-6</sup> | 20 | HPV (positive genotypes : Positive associated squamous cell carcinoma related) .                                                                                                                                                                    | HPV STATUS                                        | (S3c.2)   |
| 3.89     | 6.2×10 <sup>-6</sup> | 20 | for (high risk High)? (HPV genotypes P16) : Positive                                                                                                                                                                                                | HPV STATUS                                        | (S3c.3)   |
| 3.80     | 1.6×10 <sup>-5</sup> | 19 | tongue base (tumour biopsy)? .                                                                                                                                                                                                                      | SITE                                              | (S3c.4)   |
| 3.80     | 1.6×10 <sup>-5</sup> | 19 | tongue base (tumour biopsy)? .? ,                                                                                                                                                                                                                   | SITE                                              | (S3c.5)   |
| 3.71     | 2×10 <sup>-5</sup>   | 18 | base (of tongue tumour biopsy)? . ,                                                                                                                                                                                                                 | SITE                                              | (S3c.6)   |
| 3.23     | 2.5×10 <sup>-5</sup> | 22 | P16 immunohistochemistry? : Positive                                                                                                                                                                                                                | HPV STATUS                                        | (S3c.7)   |
| 3.62     | 4.3×10 <sup>-5</sup> | 17 | risk (. is positive HPV genotypes : Positive probe- Negative) .                                                                                                                                                                                     | HPV STATUS                                        | (S3c.8)   |
| 3.14     | 5.6×10 <sup>-5</sup> | 21 | Labelled . (right left)? lateral? tongue base                                                                                                                                                                                                       | SITE, TUMOUR LOCATION                             | (S3c.9)   |
| 3.14     | 5.6×10 <sup>-5</sup> | 21 | : (SCC R tonsil 1 and 2 Positive See recent path Reactive lymphoid hyperplasia Not identified) .                                                                                                                                                    | Mixed concept: SITE, HPV STATUS                   | (S3c.10)  |
| 3.53     | 9.3×10 <sup>-5</sup> | 16 | tongue base (tumour biopsy)? (: No evidence  , the specimen consists) of                                                                                                                                                                            | SITE                                              | (S3c.11)  |
| 3.53     | 9.3×10 <sup>-5</sup> | 16 | tongue base (tumour .)? .                                                                                                                                                                                                                           | SITE                                              | (S3c.12)  |
| 3.43     | 0.00021              | 15 | high risk (. is positive HPV genotypes : Positive) .                                                                                                                                                                                                | HPV STATUS                                        | (S3c.13)  |
| 3.43     | 0.00021              | 15 | level (1B 3 4 5A neck dissection IIa) 8                                                                                                                                                                                                             |                                                   | (S3c.14)  |
| 3.43     | 0.00021              | 15 | level (3 4 2A 5A 5B neck dissection Vb) 9                                                                                                                                                                                                           |                                                   | (S3c.15)  |
| 3.34     | 0.00046              | 14 | tumour (. , the specimen consists invades to a depth deposit but no evidence) of                                                                                                                                                                    |                                                   | (S3c.16)  |
| 3.34     | 0.00046              | 14 | : P16 immunohistochemistry :? (positive Positive) In situ                                                                                                                                                                                           | HPV STATUS                                        | (S3c.17)  |
| 2.01     | 0.00055              | 28 | to (lateral deep inferior this follow 1C 2D 3G) .                                                                                                                                                                                                   | TUMOUR LOCATION                                   | (S3c.18)  |
| 2.87     | 0.00062              | 18 | of (HPV studies specimen 1 tissue all margins this finding is uncertain bone keratinization fat basaloid type . non-keratinizing .) .                                                                                                               | PATHOLOGY FEATURE                                 | (S3c.19)  |
| 1.83     | 0.00081              | 30 | squamous cell carcinoma and squamous cell carcinoma? in                                                                                                                                                                                             |                                                   | (S3c.20)  |
| 2.06     | 0.00091              | 24 | and (2 1B 2B squamous cell carcinoma in situ both show cystic degeneration all embedded Block 1A 3B anterior focal acute on chronic inflammation identified bone contains brown watery fluid 9D . neutrophils 1H- epiglottis transverse sections) . | Mixed concept: PATHOLOGY FEATURE, TUMOUR LOCATION | (S3c.21)  |
| 3.23     | 0.001                | 13 | P16 immunohistochemistry : (positive Positive) In situ                                                                                                                                                                                              | HPV STATUS                                        | (S3c.22)  |
| 3.13     | 0.0012               | 12 | right (2A tonsil oropharyngectomy) .                                                                                                                                                                                                                | SITE                                              | (S3c.23)  |
| 3.13     | 0.0012               | 12 | , (6 9 o'clock is black poorly differentiated 16  tonsillar lymphoid tissue bone non-keratinising therefore) ,                                                                                                                                      | PATHOLOGY FEATURE, SITE                           | (S3c.24)  |
| 3.13     | 0.0012               | 12 | HPV (studies indicate the associated)                                                                                                                                                                                                               | HPV STATUS                                        | (S3c.25)  |

| Log (OR) | P      | N  | Pattern                                                                                                                                  | Comments                          | Crossref. |
|----------|--------|----|------------------------------------------------------------------------------------------------------------------------------------------|-----------------------------------|-----------|
|          |        |    | <b>squamous cell carcinoma</b>                                                                                                           |                                   |           |
| 3.13     | 0.0012 | 12 | <b>Right lateral? tongue base</b>                                                                                                        | SITE                              | (S3c.26)  |
| 3.13     | 0.0012 | 12 | <b>The (HPV studies results)? indicate the? (squamous cell carcinoma tumour) is positive for? HPV</b>                                    | HPV STATUS                        | (S3c.27)  |
| 3.13     | 0.0012 | 12 | <b>The (HPV studies results)? (indicate true margin roughened surface) is inked blue and? the</b>                                        |                                   | (S3c.28)  |
| 3.13     | 0.0012 | 12 | <b>carcinoma (, is) (positive for non-keratinising Differentiation.highest grade : Grade 3.poorly differentiated)? HPV</b>               | PATHOLOGY FEATURE, HPV STATUS     | (S3c.29)  |
| 3.13     | 0.0012 | 12 | <b>tonsillar type? lymphoid? tissue and skeletal muscle? .</b>                                                                           | SITE                              | (S3c.30)  |
| 3.13     | 0.0012 | 12 | <b>tumour (. present) ,</b>                                                                                                              |                                   | (S3c.31)  |
| 3.13     | 0.0012 | 12 | <b>. right (2A oropharyngectomy lateral)? tongue base? .</b>                                                                             | SITE, MANAGEMENT, TUMOUR LOCATION | (S3c.32)  |
| 3.13     | 0.0012 | 12 | <b>Clinical Information : SCC? R</b>                                                                                                     |                                   | (S3c.33)  |
| 2.77     | 0.0014 | 17 | <b>. (Right Left left)? tongue base</b>                                                                                                  | SITE                              | (S3c.34)  |
| 2.67     | 0.0015 | 16 | <b>, (poorly differentiated non-keratinizing non-keratinising focally keratinizing)? squamous cell carcinoma</b>                         | PATHOLOGY FEATURE                 | (S3c.35)  |
| 1.70     | 0.0018 | 32 | <b>cell carcinoma and squamous cell carcinoma? in</b>                                                                                    |                                   | (S3c.36)  |
| 3.01     | 0.0024 | 11 | <b>HPV studies :? P16 immunohistochemistry : (positive Positive) In situ</b>                                                             | HPV STATUS                        | (S3c.37)  |
| 3.01     | 0.0024 | 11 | <b>Block 10A- (one four)? (lymph two .lymph)? (nodes node) bisected? ; 10B-</b>                                                          |                                   | (S3c.38)  |
| 3.01     | 0.0024 | 11 | <b>Positive In situ (hybridisation . Ventana INFORM ISH . hybridization) for</b>                                                         |                                   | (S3c.39)  |
| 3.01     | 0.0024 | 11 | <b>tonsillar type? lymphoid tissue</b>                                                                                                   | SITE                              | (S3c.40)  |
| 3.01     | 0.0024 | 11 | <b>the (squamous cell carcinoma tumour) is HPV related</b>                                                                               | HPV STATUS                        | (S3c.41)  |
| 3.01     | 0.0024 | 11 | <b>right (2A tonsil oropharyngectomy) . ,</b>                                                                                            | SITE                              | (S3c.42)  |
| 3.01     | 0.0024 | 11 | <b>. (right left) neck? level 5A</b>                                                                                                     | NODAL                             | (S3c.43)  |
| 3.01     | 0.0024 | 11 | <b>P16 (is immunohistochemistry : Positive are both +ve) positive? .</b>                                                                 | HPV STATUS                        | (S3c.44)  |
| 3.01     | 0.0024 | 11 | <b>: The? (HPV studies results Positivity for P53 on immunohistochemistry may) indicate</b>                                              |                                   | (S3c.45)  |
| 3.01     | 0.0024 | 11 | <b>: (Metastatic The)? HPV (studies indicate the  associated related) (moderately moderate to poorly)? differentiated? squamous cell</b> | HPV STATUS                        | (S3c.46)  |
| 3.01     | 0.0024 | 11 | <b>5B- (four five) possible? lymph? nodes</b>                                                                                            |                                   | (S3c.47)  |
| 3.01     | 0.0024 | 11 | <b>, (HPV studies 3 two of which show metastatic moderate invading) to</b>                                                               |                                   | (S3c.48)  |
| 3.01     | 0.0024 | 11 | <b>tongue base .? :</b>                                                                                                                  | SITE                              | (S3c.49)  |
| 3.01     | 0.0024 | 11 | <b>squamous cell carcinoma (, is) positive for? HPV</b>                                                                                  | HPV STATUS                        | (S3c.50)  |
| 3.01     | 0.0024 | 11 | <b>. right (2A oropharyngectomy lateral)? tongue base? . ,</b>                                                                           | SITE, TUMOUR LOCATION             | (S3c.51)  |
| 2.14     | 0.0026 | 19 | <b>2A (neck dissection .)? : Metastatic</b>                                                                                              |                                   | (S3c.52)  |
| 2.57     | 0.0029 | 15 | <b>seven lymph? nodes (. identified are all negative for malignancy)? .</b>                                                              |                                   | (S3c.53)  |

| Log (OR) | P      | N  | Pattern                                                                                                                               | Comments                             | Crossref. |
|----------|--------|----|---------------------------------------------------------------------------------------------------------------------------------------|--------------------------------------|-----------|
| 2.57     | 0.0029 | 15 | pieces of (fatty red tan)? tissue                                                                                                     |                                      | (S3c.54)  |
| 1.65     | 0.0033 | 28 | of (three seven four five eight twenty one six thirteen seventeen)? lymph nodes                                                       |                                      | (S3c.55)  |
| 1.88     | 0.0038 | 22 | the (posterior half centre)? (of the multiple levels examined . entire) specimen                                                      |                                      | (S3c.56)  |
| 1.50     | 0.0043 | 33 | the (tumour deposit but no evidence largest junction area centre site presence floor absence remainder significance) of               |                                      | (S3c.57)  |
| 1.52     | 0.0044 | 30 | of (three seven a largest four involved five eight six thirteen seventeen) lymph                                                      |                                      | (S3c.58)  |
| 2.89     | 0.0047 | 10 | . (right left) neck? level 5B                                                                                                         | NODAL                                | (S3c.59)  |
| 2.89     | 0.0047 | 10 | 10 :? (. Labelled)? .? (Left left) neck                                                                                               |                                      | (S3c.60)  |
| 2.89     | 0.0047 | 10 | 12 : Labelled .? (right left)? level? (3 2B)? (. mm) ,                                                                                |                                      | (S3c.61)  |
| 2.89     | 0.0047 | 10 | The (HPV studies results)? (indicate roughened surface is inked blue and) the (squamous cell carcinoma tumour specimen) is            |                                      | (S3c.62)  |
| 2.89     | 0.0047 | 10 | ISH .? for high risk HPV genotypes : Positive                                                                                         | HPV STATUS                           | (S3c.63)  |
| 2.89     | 0.0047 | 10 | indicate the (squamous cell carcinoma tumour) is HPV related                                                                          | HPV STATUS                           | (S3c.64)  |
| 2.89     | 0.0047 | 10 | : (SCC Left .SCC Suspected) right? tongue base                                                                                        | SITE                                 | (S3c.65)  |
| 2.89     | 0.0047 | 10 | 2A (neck dissection .  + 3) :                                                                                                         |                                      | (S3c.66)  |
| 2.89     | 0.0047 | 10 | : (Right Left Labelled .) biopsy? right? tonsil                                                                                       | SITE                                 | (S3c.67)  |
| 2.89     | 0.0047 | 10 | the (inferior other)? (deep half false) margin? is inked black                                                                        | PATHOLOGY & SURGICAL CHARACTERISTICS | (S3c.68)  |
| 2.89     | 0.0047 | 10 | , two of which show metastatic moderate to? (poorly non-keratinising Differentiation. highest grade : Grade 3. poorly) differentiated | PATHOLOGY FEATURE                    | (S3c.69)  |
| 2.89     | 0.0047 | 10 | squamous cell carcinoma (. is) HPV? (present studies to follow related) .                                                             | HPV STATUS                           | (S3c.70)  |
| 2.89     | 0.0047 | 10 | pieces of (fatty red tan)? tissue ,                                                                                                   |                                      | (S3c.71)  |
| 2.89     | 0.0047 | 10 | COMMENT : The? (HPV studies results Positivity for P53 on immunohistochemistry may) indicate                                          |                                      | (S3c.72)  |
| 2.89     | 0.0047 | 10 | in the (posterior half centre)? (of the multiple levels examined .) specimen                                                          |                                      | (S3c.73)  |
| 2.89     | 0.0047 | 10 | fatty tissue ,? 35 x? 25                                                                                                              |                                      | (S3c.74)  |
| 2.89     | 0.0047 | 10 | Sections show (squamous mucosa with reactive lymphoid fibrofatty salivary gland fragments of granulation fibrotic tonsillar) tissue   | SITE                                 | (S3c.75)  |
| 2.89     | 0.0047 | 10 | P16 immunohistochemistry : (positive Positive) In situ hybridisation                                                                  | HPV STATUS                           | (S3c.76)  |
| 2.89     | 0.0047 | 10 | 2 : Right neck dissection? (level 1B tonsil oropharyngectomy) .                                                                       | NODAL, SITE                          | (S3c.77)  |
| 2.89     | 0.0047 | 10 | 3 : Labelled . right level? 2B? neck dissection? level? (2B 5A III)? .                                                                |                                      | (S3c.78)  |
| 2.89     | 0.0047 | 10 | 30 x 20 x? 10 mm in aggregate? .                                                                                                      |                                      | (S3c.79)  |
| 2.04     | 0.0051 | 18 | tumour (is present at . , appears to extend to invades into) the                                                                      |                                      | (S3c.80)  |

| Log (OR) | P      | N  | Pattern                                                                                                             | Comments                                                        | Crossref. |
|----------|--------|----|---------------------------------------------------------------------------------------------------------------------|-----------------------------------------------------------------|-----------|
| 2.04     | 0.0051 | 18 | the 3 o'clock? deep? (lateral excision surgical)? margin (in is)? inked blue? (and from)? the                       | SURGICAL CHARACTERISTICS                                        | (S3c.81)  |
| 2.04     | 0.0051 | 18 | the (specimen consists of a piece of firm margin is inked blue anterior jugular vein first cystic cavity ; 8E-) and | SURGICAL CHARACTERISTICS                                        | (S3c.82)  |
| 2.04     | 0.0051 | 18 | level (1B 4 2A + b lb) 3                                                                                            |                                                                 | (S3c.83)  |
| 2.04     | 0.0051 | 18 | (tongue base lateral inferior anterior medial superior Negative Deep) margin                                        | Mixed concept: SITE, HPV STATUS, SURGICAL CHARACTERISTICS       | (S3c.84)  |
| 2.47     | 0.0057 | 14 | transverse sections , serially? (embedded through the centre of the specimen)? from                                 |                                                                 | (S3c.85)  |
| 2.47     | 0.0057 | 14 | , (poorly differentiated non-keratinizing non-keratinising focally keratinizing) squamous                           | PATHOLOGY FEATURE                                               | (S3c.86)  |
| 2.47     | 0.0057 | 14 | , (3 6 , the specimen consists of a piece of firm deep margin inked black skeletal muscle keratinising) and         | PATHOLOGY FEATURE, SURGICAL CHARACTERISTICS                     | (S3c.87)  |
| 2.47     | 0.0057 | 14 | : The? (HPV studies results)? (tumour invades into indicate Approximately 50% of) the                               |                                                                 | (S3c.88)  |
| 2.47     | 0.0057 | 14 | and (the area one no evidence fragments fibrous clefts in keeping with base) of                                     | SITE                                                            | (S3c.89)  |
| 2.47     | 0.0057 | 14 | level (3 4 2A ll lb) 5                                                                                              |                                                                 | (S3c.90)  |
| 2.47     | 0.0057 | 14 | studies :? P16 immunohistochemistry : Positive                                                                      | HPV STATUS                                                      | (S3c.91)  |
| 1.79     | 0.0077 | 21 | 1B (3 6 8 .) .                                                                                                      |                                                                 | (S3c.92)  |
| 1.79     | 0.0077 | 21 | : (Inferior Tongue base No Margins . assessment in conjunction with separate Medial Deep Lateral) margin            | Mixed concepts: SITE, TUMOUR LOCATION, SURGICAL CHARACTERISTICS | (S3c.93)  |
| 1.79     | 0.0077 | 21 | 9 (: . )? Left                                                                                                      |                                                                 | (S3c.94)  |
| 1.43     | 0.0082 | 29 | three (lymph possible .lymph) nodes ;                                                                               |                                                                 | (S3c.95)  |
| 1.70     | 0.0083 | 20 | 10 : Labelled . left? neck? (dissection right)? level                                                               |                                                                 | (S3c.96)  |
| 1.70     | 0.0083 | 20 | mm (in at the) maximum                                                                                              |                                                                 | (S3c.97)  |
| 2.76     | 0.0093 | 9  | 7 (: x 5 x) Labelled . right? (neck dissection Right)? level? 3                                                     |                                                                 | (S3c.98)  |
| 2.76     | 0.0093 | 9  | HPV studies P16 immunohistochemistry : (positive Positive) In situ hybridisation                                    | HPV STATUS                                                      | (S3c.99)  |
| 2.76     | 0.0093 | 9  | No evidence of malignancy in eight lymph nodes? . 0.8                                                               |                                                                 | (S3c.100) |
| 2.76     | 0.0093 | 9  | cell carcinoma in one of? (three two) of? (seven five)? lymph nodes .? .                                            |                                                                 | (S3c.101) |
| 2.76     | 0.0093 | 9  | cell carcinoma (, is) HPV (studies to follow related) .                                                             | HPV STATUS                                                      | (S3c.102) |
| 2.76     | 0.0093 | 9  | lymph node (, . 0.1 . . measuring 15 x)? 10                                                                         |                                                                 | (S3c.103) |
| 2.76     | 0.0093 | 9  | 2A- three lymph nodes ; 2B-? one? (largest possible)? lymph? node                                                   |                                                                 | (S3c.104) |
| 2.76     | 0.0093 | 9  | : (Inferior Medial Lateral) margin .                                                                                | TUMOUR LOCATION                                                 | (S3c.105) |
| 2.76     | 0.0093 | 9  | HPV (, and therefore studies indicate) the                                                                          | HPV STATUS                                                      | (S3c.106) |
| 2.76     | 0.0093 | 9  | , (the specimen consists of 39) (a an orientated 58)? x? 28                                                         |                                                                 | (S3c.107) |

| Log (OR) | P      | N  | Pattern                                                                                                                                                                                                                                    | Comments                                                        | Crossref. |
|----------|--------|----|--------------------------------------------------------------------------------------------------------------------------------------------------------------------------------------------------------------------------------------------|-----------------------------------------------------------------|-----------|
| 2.76     | 0.0093 | 9  | : Positive In situ hybridisation? .                                                                                                                                                                                                        |                                                                 | (S3c.108) |
| 2.76     | 0.0093 | 9  | tonsil tumour? . ,                                                                                                                                                                                                                         | SITE                                                            | (S3c.109) |
| 2.76     | 0.0093 | 9  | right lateral? tongue base                                                                                                                                                                                                                 | SITE                                                            | (S3c.110) |
| 2.76     | 0.0093 | 9  | measures (30 20 45 approximately 11 x 10 x 5) mm                                                                                                                                                                                           |                                                                 | (S3c.111) |
| 2.76     | 0.0093 | 9  | margin .? (: No evidence a clearance being) of? malignancy .? 3                                                                                                                                                                            |                                                                 | (S3c.112) |
| 2.76     | 0.0093 | 9  | is (an infiltrate of non-keratinized extensive metastatic) squamous cell carcinoma                                                                                                                                                         |                                                                 | (S3c.113) |
| 2.76     | 0.0093 | 9  | base (: Reactive lymphoid hyperplasia tumour . margin) .                                                                                                                                                                                   | SITE (Type IIIB MD)                                             | (S3c.114) |
| 2.76     | 0.0093 | 9  | appears (involved unremarkable normal) .                                                                                                                                                                                                   |                                                                 | (S3c.115) |
| 2.76     | 0.0093 | 9  | and (squamous cell carcinoma 6C- one lymph node bisected tonsil T1 : Tumour 2 cm or less fibrous clefts) in                                                                                                                                | SITE, STAGE                                                     | (S3c.116) |
| 2.76     | 0.0093 | 9  | . (R right) oropharyngectomy                                                                                                                                                                                                               |                                                                 | (S3c.117) |
| 2.76     | 0.0093 | 9  | Description : Specimen 1 :? Labelled .? (Right right)? lateral? tongue base                                                                                                                                                                | SITE, TUMOUR LOCATION                                           | (S3c.118) |
| 2.76     | 0.0093 | 9  | : Labelled . right (2A tonsil oropharyngectomy) . , the specimen consists                                                                                                                                                                  | SITE                                                            | (S3c.119) |
| 2.76     | 0.0093 | 9  | : Labelled . right (2A oropharyngectomy tongue base) . , the specimen                                                                                                                                                                      | SITE                                                            | (S3c.120) |
| 2.76     | 0.0093 | 9  | 3 : .? Right level? 2B? neck dissection? level 2B? (5A .)? .                                                                                                                                                                               | NODAL                                                           | (S3c.121) |
| 2.76     | 0.0093 | 9  | 2 : Labelled .? (Inferior deep inferior Deep) margin                                                                                                                                                                                       | SURGICAL CHARACTERISTICS                                        | (S3c.122) |
| 2.76     | 0.0093 | 9  | Positive In situ hybridization for? (high risk High)? (HPV genotypes Comment Maxmum size) :                                                                                                                                                | HPV STATUS                                                      | (S3c.123) |
| 2.76     | 0.0093 | 9  | Right (neck dissection 1 2A oropharyngectomy) .                                                                                                                                                                                            |                                                                 | (S3c.124) |
| 2.76     | 0.0093 | 9  | Right (2A and left neck dissection oropharyngectomy) :                                                                                                                                                                                     |                                                                 | (S3c.125) |
| 2.76     | 0.0093 | 9  | The (HPV studies results) indicate                                                                                                                                                                                                         |                                                                 | (S3c.126) |
| 2.76     | 0.0093 | 9  | The (largest smaller involved)? lymph node                                                                                                                                                                                                 |                                                                 | (S3c.127) |
| 2.76     | 0.0093 | 9  | . (right left) level 1B                                                                                                                                                                                                                    | NODAL                                                           | (S3c.128) |
| 1.31     | 0.0093 | 44 | is (HPV related 5 mm tumour free positive a likely primary site present seen macroscopically serially sectioned normal clear of all margins found lymphoid hyperplasia with reactive germinal centers included posterolateral uncertain) . | Mixed concept: HPV STATUS, PATHOLOGY & SURGICAL CHARACTERISTICS | (S3c.129) |
| 1.95     | 0.01   | 17 | in one of? (three two) of? (seven five)? lymph nodes .? .                                                                                                                                                                                  |                                                                 | (S3c.130) |
| 1.95     | 0.01   | 17 | Labelled . (tongue base lateral inferior anterior medial superior) margin                                                                                                                                                                  | SITE, SURGICAL CHARACTERISTICS                                  | (S3c.131) |

**Table S3:** Full list of features listed mined by TEPAPA (Pathology reports) – (Cont'd)

**Table S3(d):** Positive binary features (regular expressions) with sequence-level annotation using UMLS vocabulary

| Log (OR) | P                    | N  | Pattern                                                                                                                                                                                                                                      | Comments                                             | Crossref. |
|----------|----------------------|----|----------------------------------------------------------------------------------------------------------------------------------------------------------------------------------------------------------------------------------------------|------------------------------------------------------|-----------|
| 3.50     | 3×10 <sup>-6</sup>   | 25 | HPV (studies genotypes status) :? P16 immunohistochemistry :? Positive                                                                                                                                                                       | HPV STATUS                                           | (S3d.1)   |
| 3.89     | 6.2×10 <sup>-6</sup> | 20 | for (high risk High)? (HPV genotypes P16) : Positive                                                                                                                                                                                         | HPV STATUS                                           | (S3d.2)   |
| 3.80     | 1.6×10 <sup>-5</sup> | 19 | tongue base (tumour biopsy)? .                                                                                                                                                                                                               | SITE                                                 | (S3d.3)   |
| 3.80     | 1.6×10 <sup>-5</sup> | 19 | tongue base (tumour biopsy)? .? ,                                                                                                                                                                                                            | SITE                                                 | (S3d.4)   |
| 3.80     | 1.6×10 <sup>-5</sup> | 19 | HPV (positive genotypes : Positive related) .                                                                                                                                                                                                | HPV STATUS                                           | (S3d.5)   |
| 3.23     | 2.5×10 <sup>-5</sup> | 22 | P16 immunohistochemistry? : Positive                                                                                                                                                                                                         | HPV STATUS                                           | (S3d.6)   |
| 3.23     | 2.5×10 <sup>-5</sup> | 22 | . (Right Left right left right lateral)? tongue base                                                                                                                                                                                         | SITE                                                 | (S3d.7)   |
| 2.68     | 4.5×10 <sup>-5</sup> | 25 | : (SCC R tonsil 1 and 2 Left inferior turbinate Positive One benign lymph node Level 4 Level 5 See recent path Reactive lymphoid hyperplasia No malignancy Not identified) .                                                                 | NODAL, SITE, HPV STATUS                              | (S3d.8)   |
| 3.53     | 9.3×10 <sup>-5</sup> | 16 | tongue base (tumour .)? .                                                                                                                                                                                                                    | SITE                                                 | (S3d.9)   |
| 3.53     | 9.3×10 <sup>-5</sup> | 16 | tongue base (tumour biopsy)? . , the                                                                                                                                                                                                         | SITE                                                 | (S3d.10)  |
| 2.19     | 0.00011              | 30 | to (poorly differentiated squamous cell carcinoma . 2.9 . lateral deep inferior this follow squamous cell carcinoma in situ 2D 1C 3G) .                                                                                                      | TUMOUR LOCATION                                      | (S3d.11)  |
| 3.05     | 0.00012              | 20 | Labelled . (right left right lateral)? tongue base                                                                                                                                                                                           | SITE                                                 | (S3d.12)  |
| 3.43     | 0.00021              | 15 | high risk (. is positive HPV genotypes : Positive)                                                                                                                                                                                           | HPV STATUS                                           | (S3d.13)  |
| 2.96     | 0.00028              | 19 | of (HPV studies P16 immunohistochemistry : Positive In situ hybridisation tumour the specimen all eight bocks which show metastatic moderate to poorly differentiated squamous cell carcinoma margins human papilloma virus basaloid type) . | Mixed concepts: HPV STATUS, SURGICAL CHARACTERISTICS | (S3d.14)  |
| 2.96     | 0.00028              | 19 | : Labelled . (right left right lateral)? tongue base                                                                                                                                                                                         | SITE                                                 | (S3d.15)  |
| 2.87     | 0.00062              | 18 | , (3 6 , the specimen consists of a piece of firm deep margin inked black skeletal muscle minor salivary glands keratinising mucoserous glands) and                                                                                          | PATHOLOGY FEATURE, SURGICAL CHARACTERISTICS          | (S3d.16)  |
| 2.33     | 0.00064              | 21 | Labelled . (right left right lateral)? tongue                                                                                                                                                                                                | SITE                                                 | (S3d.17)  |
| 1.83     | 0.00081              | 30 | of (HPV studies seven lymph nodes specimen 1 salivary gland submandibular gland tissue all margins this finding is uncertain bone non-keratinized squamous cell carcinoma squamous cell carcinoma in situ keratinization fat) .              |                                                      | (S3d.18)  |
| 3.23     | 0.001                | 13 | right (2A tonsil oropharyngectomy tongue base) . , the specimen consists of                                                                                                                                                                  | SITE                                                 | (S3d.19)  |
| 3.23     | 0.001                | 13 | level (3 2A 5A 5B neck dissection Vb) 9                                                                                                                                                                                                      |                                                      | (S3d.20)  |
| 3.23     | 0.001                | 13 | : (SCC Right Left Right lateral) tongue base                                                                                                                                                                                                 | SITE                                                 | (S3d.21)  |
| 3.13     | 0.0012               | 12 | HPV (studies indicate the associated) squamous cell carcinoma                                                                                                                                                                                | HPV STATUS                                           | (S3d.22)  |
| 3.13     | 0.0012               | 12 | level (1B 3 5A neck dissection IIa) 8                                                                                                                                                                                                        |                                                      | (S3d.23)  |
| 3.13     | 0.0012               | 12 | The (HPV studies results)? indicate the?                                                                                                                                                                                                     | HPV STATUS                                           | (S3d.24)  |

| Log (OR) | P      | N  | Pattern                                                                                                                                                    | Comments                | Crossref. |
|----------|--------|----|------------------------------------------------------------------------------------------------------------------------------------------------------------|-------------------------|-----------|
|          |        |    | (tumour squamous cell carcinoma) is positive for? HPV                                                                                                      |                         |           |
| 3.13     | 0.0012 | 12 | : The? (results Metastatic)? HPV? studies? indicate the? (tumour squamous cell carcinoma)? is HPV? related                                                 | HPV STATUS              | (S3d.25)  |
| 3.13     | 0.0012 | 12 | , (6 9 o'clock is black poorly differentiated non-keratinising 16 bone tonsillar lymphoid tissue  therefore) ,                                             | PATHOLOGY FEATURE, SITE | (S3d.26)  |
| 3.13     | 0.0012 | 12 | Clinical Information : SCC? R                                                                                                                              |                         | (S3d.27)  |
| 3.13     | 0.0012 | 12 | mm (. macroscopic . long oriented mucosal excision with two sutures denoting anterior tan  thick) and                                                      | TUMOUR LOCATION         | (S3d.28)  |
| 3.13     | 0.0012 | 12 | tumour (. present) ,                                                                                                                                       |                         | (S3d.29)  |
| 2.23     | 0.0013 | 20 | : Labelled . (right left right lateral)? tongue                                                                                                            | SITE                    | (S3d.30)  |
| 2.67     | 0.0015 | 16 | The (HPV studies results)? (tumour indicate) (appears to extend to invades into)? the                                                                      |                         | (S3d.31)  |
| 3.01     | 0.0024 | 11 | tongue base .? :                                                                                                                                           | SITE                    | (S3d.32)  |
| 3.01     | 0.0024 | 11 | the (tumour squamous cell carcinoma) is HPV related                                                                                                        | HPV STATUS              | (S3d.33)  |
| 3.01     | 0.0024 | 11 | squamous cell carcinoma (, is) positive for? HPV                                                                                                           | HPV STATUS              | (S3d.34)  |
| 3.01     | 0.0024 | 11 | Right (tonsil oropharyngectomy)? (2A tumour)?                                                                                                              | SITE                    | (S3d.35)  |
| 3.01     | 0.0024 | 11 | . (right left) neck? level 5A                                                                                                                              | NODAL                   | (S3d.36)  |
| 3.01     | 0.0024 | 11 | P16 (is immunohistochemistry : Positive are both +ve) positive? .                                                                                          | HPV STATUS              | (S3d.37)  |
| 3.01     | 0.0024 | 11 | : The? (HPV studies results Positivity for P53 on immunohistochemistry may) indicate                                                                       |                         | (S3d.38)  |
| 3.01     | 0.0024 | 11 | : (Metastatic squamous cell carcinoma Positive In situ hybridisation Moderately differentiated) . (Ventana INFORM ISH 1.9 Grade 2 of 3) .                  |                         | (S3d.39)  |
| 3.01     | 0.0024 | 11 | : (The Metastatic)? HPV (associated related)? (studies indicate the moderately differentiated  moderate to poorly differentiated)? squamous cell carcinoma | HPV STATUS              | (S3d.40)  |
| 3.01     | 0.0024 | 11 | : P16 immunohistochemistry :? Positive (In situ hybridisation . Ventana INFORM ISH . In situ hybridization) for                                            | HPV STATUS              | (S3d.41)  |
| 3.01     | 0.0024 | 11 | : The (HPV studies results)? indicate the? (tumour squamous cell carcinoma) is positive for? HPV                                                           | HPV STATUS              | (S3d.42)  |
| 3.01     | 0.0024 | 11 | , (HPV studies 3 two of which show metastatic moderate invading) to                                                                                        |                         | (S3d.43)  |
| 2.57     | 0.0029 | 15 | seven (lymph nodes nodes) (. identified are all negative for malignancy)? .                                                                                |                         | (S3d.44)  |
| 2.57     | 0.0029 | 15 | . (Right Left right left right lateral) tongue                                                                                                             | SITE                    | (S3d.45)  |
| 2.57     | 0.0029 | 15 | 10 nodes? . .                                                                                                                                              |                         | (S3d.46)  |
| 1.88     | 0.0038 | 22 | the (posterior half centre)? (of the multiple levels examined . entire) specimen                                                                           |                         | (S3d.47)  |
| 2.89     | 0.0047 | 10 | : (Metastatic Squamous cell carcinoma .)? HPV related moderate to? (poorly Grade 3 .poorly) differentiated                                                 | HPV STATUS              | (S3d.48)  |
| 2.89     | 0.0047 | 10 | 5C- (four five)? possible? lymph nodes ; 5D-?                                                                                                              |                         | (S3d.49)  |

| Log (OR) | P      | N  | Pattern                                                                                                                             | Comments                                                    | Crossref. |
|----------|--------|----|-------------------------------------------------------------------------------------------------------------------------------------|-------------------------------------------------------------|-----------|
|          |        |    | <b>two? possible? lymph nodes</b>                                                                                                   |                                                             |           |
| 2.89     | 0.0047 | 10 | <b>the (inferior other)? (deep half false) margin? is inked black</b>                                                               | SURGICAL CHARACTERISTICS                                    | (S3d.50)  |
| 2.89     | 0.0047 | 10 | <b>right (neck level 4 tonsil oropharyngectomy)? . , the specimen consists of a</b>                                                 | NODAL, SITE                                                 | (S3d.51)  |
| 2.89     | 0.0047 | 10 | <b>lymph nodes (. identified are all negative for malignancy)? . (0. 0.8 0.3) . ? . ? 10</b>                                        |                                                             | (S3d.52)  |
| 2.89     | 0.0047 | 10 | <b>a large single lymph node exhibiting metastatic cystic? moderately differentiated non -keratinising? squamous cell carcinoma</b> | PATHOLOGY FEATURE                                           | (S3d.53)  |
| 2.89     | 0.0047 | 10 | <b>2A (neck dissection .  + 3) :</b>                                                                                                |                                                             | (S3d.54)  |
| 2.89     | 0.0047 | 10 | <b>10 :? (. Labelled)? . ? (Left left) neck</b>                                                                                     |                                                             | (S3d.55)  |
| 2.89     | 0.0047 | 10 | <b>. (right left) neck? level 5B</b>                                                                                                | NODAL                                                       | (S3d.56)  |
| 2.89     | 0.0047 | 10 | <b>The (HPV studies results)? (indicate roughened surface is inked blue and) the (tumour specimen squamous cell carcinoma) is</b>   |                                                             | (S3d.57)  |
| 2.89     | 0.0047 | 10 | <b>ISH .? for high risk HPV genotypes : Positive</b>                                                                                | HPV STATUS                                                  | (S3d.58)  |
| 2.89     | 0.0047 | 10 | <b>in the (posterior half centre)? (of the multiple levels examined .) specimen</b>                                                 |                                                             | (S3d.59)  |
| 2.89     | 0.0047 | 10 | <b>: (SCC R Right Labelled .) biopsy? right? tonsil</b>                                                                             | SITE                                                        | (S3d.60)  |
| 2.89     | 0.0047 | 10 | <b>: (1 Laterality Squamous cell carcinoma Results Moderately differentiated . Grade 2 Approximately 50%) of</b>                    |                                                             | (S3d.61)  |
| 2.89     | 0.0047 | 10 | <b>, (poorly differentiated non -keratinising) squamous cell carcinoma</b>                                                          | PATHOLOGY FEATURE                                           | (S3d.62)  |
| 2.89     | 0.0047 | 10 | <b>indicate the (tumour squamous cell carcinoma) is HPV related</b>                                                                 | HPV STATUS                                                  | (S3d.63)  |
| 2.89     | 0.0047 | 10 | <b>pieces of (red tan)? (fatty tissue tissue) ,</b>                                                                                 |                                                             | (S3d.64)  |
| 2.89     | 0.0047 | 10 | <b>2 : Right neck dissection? (level 1B tonsil oropharyngectomy) .</b>                                                              | NODAL, SITE                                                 | (S3d.65)  |
| 2.89     | 0.0047 | 10 | <b>30 x 20 x? 10 mm in aggregate? .</b>                                                                                             |                                                             | (S3d.66)  |
| 2.89     | 0.0047 | 10 | <b>4 : Labelled . right? neck dissection? (level 4 left level IIa) . ,</b>                                                          | NODAL                                                       | (S3d.67)  |
| 2.89     | 0.0047 | 10 | <b>COMMENT : The? (HPV studies results Positivity for P53 on immunohistochemistry may) indicate</b>                                 |                                                             | (S3d.68)  |
| 2.89     | 0.0047 | 10 | <b>P16 immunohistochemistry : (positive Positive) In situ hybridisation</b>                                                         | HPV STATUS                                                  | (S3d.69)  |
| 2.89     | 0.0047 | 10 | <b>Block 4A- (three two six possible) .? lymph nodes</b>                                                                            |                                                             | (S3d.70)  |
| 2.04     | 0.0051 | 18 | <b>. (tongue base lateral inferior anterior medial superior Negative Deep) margin</b>                                               | SITE, HPV STATUS, TUMOUR LOCATION, SURGICAL CHARACTERISTICS | (S3d.71)  |
| 2.04     | 0.0051 | 18 | <b>the (specimen consists of a piece of firm margin is inked blue anterior jugular vein first cystic cavity ; 8E-) and</b>          | Mixed concepts: TUMOUR LOCATION, SURGICAL CHARACTERISTICS   | (S3d.72)  |
| 2.04     | 0.0051 | 18 | <b>tumour (is present at . , appears to extend to invades into) the</b>                                                             |                                                             | (S3d.73)  |
| 1.42     | 0.0053 | 35 | <b>and (2 1B 2B 3B both show cystic degeneration </b>                                                                               | Mixed concepts:                                             | (S3d.74)  |



| Log (OR) | P      | N  | Pattern                                                                                                                                                                                                                                                                                                     | Comments                                        | Crossref. |
|----------|--------|----|-------------------------------------------------------------------------------------------------------------------------------------------------------------------------------------------------------------------------------------------------------------------------------------------------------------|-------------------------------------------------|-----------|
|          |        |    | all embedded Block 1A anterior skeletal muscle focal acute on chronic inflammation identified bone contains brown watery fluid  minor salivary glands 9D . squamous cell carcinoma in situ neutrophils tonsillar lymphoid tissue 1H - epiglottis transverse sections  mucoserous glands skeletal muscles) . | PATHOLOGY FEATURE, SITE, TUMOUR LOCATION        |           |
| 2.47     | 0.0057 | 14 | Right (level 4 2A oropharyngectomy tongue base) :                                                                                                                                                                                                                                                           | NODAL, SITE                                     | (S3d.75)  |
| 2.47     | 0.0057 | 14 | studies :? P16 immunohistochemistry : Positive                                                                                                                                                                                                                                                              | HPV STATUS                                      | (S3d.76)  |
| 2.47     | 0.0057 | 14 | : (SCC Right Left Right lateral) tongue                                                                                                                                                                                                                                                                     | SITE                                            | (S3d.77)  |
| 2.47     | 0.0057 | 14 | : The? (HPV studies results)? (tumour invades into indicate Approximately 50% of) the                                                                                                                                                                                                                       |                                                 | (S3d.78)  |
| 1.56     | 0.0065 | 27 | of (three seven four five eight six thirteen  seventeen twenty one) lymph nodes                                                                                                                                                                                                                             |                                                 | (S3d.79)  |
| 1.79     | 0.0077 | 21 | 1B (3 6 8 .)                                                                                                                                                                                                                                                                                                |                                                 | (S3d.80)  |
| 1.79     | 0.0077 | 21 | 9 (: .)? Left                                                                                                                                                                                                                                                                                               |                                                 | (S3d.81)  |
| 1.79     | 0.0077 | 21 | : (Inferior Tongue base No Margins . assessment in conjunction with separate  Medial Deep Lateral) margin                                                                                                                                                                                                   | SITE, TUMOUR LOCATION, SURGICAL CHARACTERISTICS | (S3d.82)  |
| 1.43     | 0.0082 | 29 | three (possible nodes .)? lymph nodes? ;                                                                                                                                                                                                                                                                    |                                                 | (S3d.83)  |
| 1.70     | 0.0083 | 20 | right (level 4 2A tonsil oropharyngectomy  tongue base level III) .                                                                                                                                                                                                                                         | NODAL, SITE                                     | (S3d.84)  |
| 1.70     | 0.0083 | 20 | mm (in at the) maximum                                                                                                                                                                                                                                                                                      |                                                 | (S3d.85)  |
| 2.76     | 0.0093 | 9  | , (the specimen consists of 39) (a an orientated 58)? x? 28                                                                                                                                                                                                                                                 |                                                 | (S3d.86)  |
| 2.76     | 0.0093 | 9  | . (R right) oropharyngectomy                                                                                                                                                                                                                                                                                | MANAGEMENT                                      | (S3d.87)  |
| 2.76     | 0.0093 | 9  | The (HPV studies results) indicate                                                                                                                                                                                                                                                                          |                                                 | (S3d.88)  |
| 2.76     | 0.0093 | 9  | : (No evidence of No dysplasia or)? (1 and  malignancy Tumour) 2                                                                                                                                                                                                                                            | PATHOLOGY FEATURE                               | (S3d.89)  |
| 2.76     | 0.0093 | 9  | a (tumour fibrofatty tissue fatty tissue poorly differentiated P53 mutation) ,                                                                                                                                                                                                                              | PATHOLOGY FEATURE                               | (S3d.90)  |
| 2.76     | 0.0093 | 9  | appears (involved unremarkable normal) .                                                                                                                                                                                                                                                                    |                                                 | (S3d.91)  |
| 2.76     | 0.0093 | 9  | margin .? (: No evidence of malignancy . a clearance of being) 3                                                                                                                                                                                                                                            |                                                 | (S3d.92)  |
| 2.76     | 0.0093 | 9  | : (Inferior Medial Lateral) margin .                                                                                                                                                                                                                                                                        | TUMOUR LOCATION                                 | (S3d.93)  |
| 2.76     | 0.0093 | 9  | squamous cell carcinoma (, is) HPV (studies to follow related) .                                                                                                                                                                                                                                            | HPV STATUS                                      | (S3d.96)  |
| 2.76     | 0.0093 | 9  | HPV studies P16 immunohistochemistry : (positive Positive) In situ hybridisation                                                                                                                                                                                                                            | HPV STATUS                                      | (S3d.97)  |
| 2.76     | 0.0093 | 9  | . (right left) level 1B                                                                                                                                                                                                                                                                                     | NODAL                                           | (S3d.98)  |
| 2.76     | 0.0093 | 9  | HPV (, and therefore studies indicate) the                                                                                                                                                                                                                                                                  | HPV STATUS                                      | (S3d.100) |
| 2.76     | 0.0093 | 9  | 2 : Labelled . right neck dissection level? (1B  level 4 1b) .                                                                                                                                                                                                                                              | NODAL                                           | (S3d.101) |
| 2.76     | 0.0093 | 9  | Positive (In situ hybridisation . Ventana INFORM ISH . In situ hybridization) for high risk                                                                                                                                                                                                                 | HPV STATUS                                      | (S3d.102) |
| 2.76     | 0.0093 | 9  | Positive In situ hybridization for? (high risk  High)? (HPV genotypes Comment Maxmum size) :                                                                                                                                                                                                                | HPV STATUS                                      | (S3d.103) |
| 2.76     | 0.0093 | 9  | 2 : Labelled .? (Inferior deep inferior Deep)                                                                                                                                                                                                                                                               | SURGICAL                                        | (S3d.104) |

| Log (OR) | P      | N  | Pattern                                                                   | Comments                                        | Crossref. |
|----------|--------|----|---------------------------------------------------------------------------|-------------------------------------------------|-----------|
|          |        |    | margin                                                                    | CHARACTERISTICS                                 |           |
| 2.76     | 0.0093 | 9  | 3 : .? Right level? 2B? neck dissection? level 2B? (5A .)? .              | NODAL                                           | (S3d.105) |
| 2.76     | 0.0093 | 9  | 4 : Right? neck dissection? (level 4 Left level IIa Level 4) .            | NODAL                                           | (S3d.106) |
| 2.76     | 0.0093 | 9  | : Positive In situ hybridisation? .                                       |                                                 | (S3d.107) |
| 2.76     | 0.0093 | 9  | No evidence of malignancy in eight lymph nodes? . 0.8                     |                                                 | (S3d.109) |
| 1.95     | 0.01   | 17 | Labelled . (tongue base lateral inferior anterior medial superior) margin | SITE, TUMOUR LOCATION, SURGICAL CHARACTERISTICS | (S3d.110) |
| 1.95     | 0.01   | 17 | in one of? (three two) of? (seven five)? lymph nodes .? .                 |                                                 | (S3d.111) |

**Table S3:** Full list of features listed mined by TEPAPA (Pathology reports) – (Cont'd)**Table S3(e):** Negative binary features (n-gram) without sequence-level annotation

| Log (OR) | P       | N  | Pattern                                               | Comments                       | Crossref. |
|----------|---------|----|-------------------------------------------------------|--------------------------------|-----------|
| -2.37    | 0.00029 | 16 | : Negative                                            | HPV STATUS (Type IIIA MD)      | (S3e.1)   |
| -3.54    | 0.00035 | 8  | for decalcification                                   | TUMOUR LOCATION (Type IIIA MD) | (S3e.2)   |
| -3.54    | 0.00035 | 8  | The sections of the                                   |                                | (S3e.3)   |
| -2.94    | 0.00081 | 10 | with mild                                             |                                | (S3e.4)   |
| -3.37    | 0.001   | 7  | Specimen 3 : " Left                                   |                                | (S3e.5)   |
| -3.37    | 0.001   | 7  | lobe of                                               |                                | (S3e.6)   |
| -3.37    | 0.001   | 7  | a depth of 3 mm                                       |                                | (S3e.7)   |
| -3.37    | 0.001   | 7  | : Sections                                            |                                | (S3e.8)   |
| -2.09    | 0.0018  | 14 | are clear                                             |                                | (S3e.9)   |
| -1.56    | 0.002   | 31 | This                                                  |                                | (S3e.10)  |
| -2.77    | 0.0022  | 9  | o'clock margin                                        | SURGICAL CHARACTERISTICS       | (S3e.11)  |
| -2.77    | 0.0022  | 9  | posterior aspect                                      |                                | (S3e.12)  |
| -2.37    | 0.0023  | 12 | invasive malignancy .                                 |                                | (S3e.13)  |
| -3.18    | 0.0029  | 6  | the possibility of                                    |                                | (S3e.14)  |
| -3.18    | 0.0029  | 6  | soft tissue and                                       |                                | (S3e.15)  |
| -3.18    | 0.0029  | 6  | post                                                  |                                | (S3e.16)  |
| -1.53    | 0.0034  | 29 | 2 mm .                                                |                                | (S3e.17)  |
| -1.52    | 0.0044  | 45 | seen .                                                |                                | (S3e.18)  |
| -1.67    | 0.0049  | 17 | inflammation .                                        |                                | (S3e.19)  |
| -2.22    | 0.0053  | 11 | formation                                             |                                | (S3e.20)  |
| -2.22    | 0.0053  | 11 | mild chronic                                          |                                | (S3e.21)  |
| -2.59    | 0.0058  | 8  | 5 x 5 x                                               |                                | (S3e.22)  |
| -2.59    | 0.0058  | 8  | differentiated , keratinising squamous cell carcinoma | PATHOLOGY FEATURE              | (S3e.23)  |
| -2.59    | 0.0058  | 8  | involve                                               |                                | (S3e.24)  |
| -2.59    | 0.0058  | 8  | the soft                                              |                                | (S3e.25)  |
| -2.59    | 0.0058  | 8  | well differentiated                                   | PATHOLOGY FEATURE              | (S3e.26)  |
| -2.59    | 0.0058  | 8  | x 7 x 3 mm                                            |                                | (S3e.27)  |
| -1.78    | 0.0065  | 15 | focus                                                 |                                | (S3e.28)  |
| -2.98    | 0.0083  | 5  | 9 x 6                                                 |                                | (S3e.29)  |
| -2.98    | 0.0083  | 5  | Block 2A- five                                        |                                | (S3e.30)  |
| -2.98    | 0.0083  | 5  | effect .                                              |                                | (S3e.31)  |
| -2.98    | 0.0083  | 5  | neural                                                |                                | (S3e.32)  |
| -2.98    | 0.0083  | 5  | suspicious for                                        |                                | (S3e.33)  |
| -1.34    | 0.0088  | 33 | area                                                  |                                | (S3e.34)  |
| -1.31    | 0.0093  | 31 | features                                              |                                | (S3e.35)  |
| -1.33    | 0.0099  | 41 | show a                                                |                                | (S3e.36)  |
| -1.40    | 0.0099  | 22 | margins are                                           |                                | (S3e.37)  |

**Table S3:** Full list of features listed mined by TEPAPA (Pathology reports) – (Cont'd)**Table S3(f):** Negative binary features (n-gram) with sequence-level annotation using UMLS vocabulary

| Log (OR) | P       | N  | Pattern                                | Comments                  | Crossref. |
|----------|---------|----|----------------------------------------|---------------------------|-----------|
| -2.37    | 0.00029 | 16 | : Negative                             | HPV STATUS (Type IIIB MD) | (S3f.1)   |
| -3.54    | 0.00035 | 8  | for decalcification                    | PATHOLOGY FEATURE         | (S3f.2)   |
| -3.54    | 0.00035 | 8  | The sections of the                    |                           | (S3f.3)   |
| -3.37    | 0.001   | 7  | a depth of 3 mm                        |                           | (S3f.4)   |
| -3.37    | 0.001   | 7  | more                                   |                           | (S3f.5)   |
| -3.37    | 0.001   | 7  | : Sections                             |                           | (S3f.6)   |
| -2.09    | 0.0018  | 14 | are clear                              |                           | (S3f.7)   |
| -1.56    | 0.002   | 31 | This                                   |                           | (S3f.8)   |
| -2.77    | 0.0022  | 9  | posterior aspect                       |                           | (S3f.9)   |
| -2.37    | 0.0023  | 12 | invasive malignancy .                  |                           | (S3f.10)  |
| -1.74    | 0.0028  | 20 | invasion is                            |                           | (S3f.11)  |
| -3.18    | 0.0029  | 6  | lobe of                                |                           | (S3f.12)  |
| -3.18    | 0.0029  | 6  | the possibility of                     |                           | (S3f.13)  |
| -3.18    | 0.0029  | 6  | soft tissue and                        |                           | (S3f.14)  |
| -1.53    | 0.0034  | 29 | 2 mm .                                 |                           | (S3f.15)  |
| -2.59    | 0.0058  | 8  | blue inked                             |                           | (S3f.16)  |
| -2.59    | 0.0058  | 8  | lateral aspect of                      |                           | (S3f.17)  |
| -2.59    | 0.0058  | 8  | well differentiated                    | PATHOLOGY FEATURE         | (S3f.18)  |
| -2.59    | 0.0058  | 8  | , keratinising squamous cell carcinoma | PATHOLOGY FEATURE         | (S3f.19)  |
| -2.59    | 0.0058  | 8  | 5 x 5 x                                |                           | (S3f.20)  |
| -2.59    | 0.0058  | 8  | involve                                |                           | (S3f.21)  |
| -2.59    | 0.0058  | 8  | x 7 x 3 mm                             |                           | (S3f.22)  |
| -1.78    | 0.0065  | 15 | focus                                  |                           | (S3f.23)  |
| -2.98    | 0.0083  | 5  | anterior commissure                    |                           | (S3f.24)  |
| -2.98    | 0.0083  | 5  | , focal                                |                           | (S3f.25)  |
| -2.98    | 0.0083  | 5  | with mild chronic inflammation         | PATHOLOGY FEATURE         | (S3f.26)  |
| -2.98    | 0.0083  | 5  | suspicious for                         |                           | (S3f.27)  |
| -2.98    | 0.0083  | 5  | neural                                 |                           | (S3f.28)  |
| -2.98    | 0.0083  | 5  | effect .                               |                           | (S3f.29)  |
| -2.98    | 0.0083  | 5  | Specimen 3 : " Left                    |                           | (S3f.30)  |
| -2.98    | 0.0083  | 5  | and in                                 |                           | (S3f.31)  |
| -2.98    | 0.0083  | 5  | Block 2A - five                        |                           | (S3f.32)  |
| -2.98    | 0.0083  | 5  | /2015 11 :                             |                           | (S3f.33)  |
| -2.98    | 0.0083  | 5  | but the                                |                           | (S3f.34)  |
| -2.98    | 0.0083  | 5  | 9 x 6                                  |                           | (S3f.35)  |
| -1.34    | 0.0088  | 33 | area                                   |                           | (S3f.36)  |
| -1.31    | 0.0093  | 31 | features                               |                           | (S3f.37)  |
| -1.33    | 0.0099  | 41 | Negative                               | HPV STATUS (Type IIIB MD) | (S3f.38)  |
| -1.33    | 0.0099  | 41 | show a                                 |                           | (S3f.39)  |

**Table S3:** Full list of features listed mined by TEPAPA (Pathology reports) – (Cont'd)

**Table S3(g):** Negative binary features (regular expressions) without sequence-level annotation

| Log (OR) | P                    | N  | Pattern                                                                                                                                                                                                                                                                   | Comments                                   | Crossref. |
|----------|----------------------|----|---------------------------------------------------------------------------------------------------------------------------------------------------------------------------------------------------------------------------------------------------------------------------|--------------------------------------------|-----------|
| -3.24    | 9.7×10 <sup>-5</sup> | 12 | The paraffin? sections of                                                                                                                                                                                                                                                 |                                            | (S3g.1)   |
| -3.69    | 0.00011              | 9  | consists of (three a one two)? 3 mm                                                                                                                                                                                                                                       |                                            | (S3g.2)   |
| -2.21    | 0.00014              | 21 | The (sections base central portion lesion is 2 mm clear cut surface edge remainder  outside) of the                                                                                                                                                                       | SITE (Type IIIB MD)                        | (S3g.3)   |
| -2.66    | 0.00016              | 14 | for (high risk HPV genotypes : Negative  decalcification) prior to further dissection? .                                                                                                                                                                                  | HPV STATUS, TUMOUR LOCATION (Type IIIB MD) | (S3g.4)   |
| -2.66    | 0.00016              | 14 | of metastatic moderate to? (poorly  moderately well) differentiated                                                                                                                                                                                                       | PERFORMANCE STATUS                         | (S3g.5)   |
| -3.09    | 0.00029              | 11 | , (invasive moderately differentiated  keratinising) squamous cell carcinoma                                                                                                                                                                                              | PATHOLOGY FEATURE                          | (S3g.6)   |
| -3.54    | 0.00035              | 8  | medial tongue? (. , aspect of) the                                                                                                                                                                                                                                        | SITE                                       | (S3g.7)   |
| -3.54    | 0.00035              | 8  | . , the specimen consists of (9 x three one  two)? 3                                                                                                                                                                                                                      |                                            | (S3g.8)   |
| -2.52    | 0.00046              | 13 | mm (mucosal pale tan punch) biopsy                                                                                                                                                                                                                                        | TUMOUR LOCATION (Type IIIB MD)             | (S3g.9)   |
| -2.06    | 0.00071              | 17 | the (lateral inferior medial posterior) aspect                                                                                                                                                                                                                            | TUMOUR LOCATION (Type IIIB MD)             | (S3g.10)  |
| -3.37    | 0.001                | 7  | with (high low)? (grade mild) dysplasia                                                                                                                                                                                                                                   | PATHOLOGY FEATURE                          | (S3g.11)  |
| -3.37    | 0.001                | 7  | right (neck temple) dissection? :                                                                                                                                                                                                                                         |                                            | (S3g.12)  |
| -3.37    | 0.001                | 7  | of (moderately metastatic moderate to poorly) differentiated , keratinising? squamous cell                                                                                                                                                                                | PATHOLOGY FEATURE                          | (S3g.13)  |
| -3.37    | 0.001                | 7  | with mild (dysplasia chronic inflammation) .                                                                                                                                                                                                                              | PATHOLOGY FEATURE                          | (S3g.14)  |
| -1.65    | 0.0014               | 26 | the (level base larger piece surface region  margins majority edge edges proximal margin request shape possibility rest  periphery) of                                                                                                                                    | SITE                                       | (S3g.15)  |
| -1.64    | 0.0019               | 35 | the (squamous epithelium carcinoma tumour  right largest bisected surface maximum dimension bone other end margins lesion  report is missing biopsy multiple sections examined stroma lip floor of mouth thyroid cartilage following features diagnosis  opposite side) . |                                            | (S3g.16)  |
| -1.81    | 0.0021               | 18 | . (for high risk HPV genotypes : Negative  lymph nodes . dysplasia margins Alarm continuation sequencing error) .                                                                                                                                                         | HPV STATUS, PATHOLOGY FEATURE              | (S3g.17)  |
| -2.77    | 0.0022               | 9  | 12 o'clock superior? (. , and margin of) the                                                                                                                                                                                                                              |                                            | (S3g.18)  |
| -2.77    | 0.0022               | 9  | sections of (the salivary)? submandibular? (3 and 9 o'clock the gland) (are unremarkable  ends)? respectively? .                                                                                                                                                          |                                            | (S3g.19)  |
| -2.77    | 0.0022               | 9  | : (P16 immunohistochemistry : Squamous cell carcinoma)? (An Negative In)? in? situ                                                                                                                                                                                        | HPV STATUS                                 | (S3g.20)  |
| -2.77    | 0.0022               | 9  | differentiated squamous cell? (carcinoma  adenocarcinoma) with                                                                                                                                                                                                            |                                            | (S3g.21)  |

| Log (OR) | P      | N  | Pattern                                                                                                                             | Comments                       | Crossref. |
|----------|--------|----|-------------------------------------------------------------------------------------------------------------------------------------|--------------------------------|-----------|
| -2.37    | 0.0023 | 12 | consists of (three one two)? 3                                                                                                      |                                | (S3g.22)  |
| -3.18    | 0.0029 | 6  | of (the resection are clear) (right side lesion appears complete and)? of? the                                                      |                                | (S3g.23)  |
| -3.18    | 0.0029 | 6  | tissue (: No evidence of malignancy . ,) 6                                                                                          |                                | (S3g.24)  |
| -3.18    | 0.0029 | 6  | the (carcinoma with specimen show lesion appears complete and) the                                                                  |                                | (S3g.25)  |
| -3.18    | 0.0029 | 6  | studies :? (for high risk HPV P16 immunohistochemistry : Negative In situ hybridisation) .                                          | HPV STATUS                     | (S3g.26)  |
| -3.18    | 0.0029 | 6  | of (tumour the submandibular gland resection) are                                                                                   |                                | (S3g.27)  |
| -3.18    | 0.0029 | 6  | of one punch biopsy ,? 2 x 2? mm .                                                                                                  | TUMOUR LOCATION (Type IIIB MD) | (S3g.28)  |
| -3.18    | 0.0029 | 6  | medial tongue? . , the specimen                                                                                                     | SITE                           | (S3g.29)  |
| -3.18    | 0.0029 | 6  | biopsy of skin? (to shows) a                                                                                                        |                                | (S3g.30)  |
| -3.18    | 0.0029 | 6  | a (small large) area                                                                                                                |                                | (S3g.31)  |
| -3.18    | 0.0029 | 6  | 4 (: .) . Left                                                                                                                      |                                | (S3g.32)  |
| -3.18    | 0.0029 | 6  | Block 2A- (four possible five) lymph? nodes ; 2B-                                                                                   |                                | (S3g.33)  |
| -3.18    | 0.0029 | 6  | 1 : (. Deep medial margin)? Right? (level IIb vocal cord .)? .                                                                      | NODAL, SITE                    | (S3g.34)  |
| -1.92    | 0.003  | 16 | of (three one two)? 3 mm                                                                                                            |                                | (S3g.35)  |
| -1.53    | 0.0034 | 29 | sections (of; 3E- from) the                                                                                                         |                                | (S3g.36)  |
| -1.49    | 0.0042 | 34 | 2 mm (of extranodal spread pale biopsy from the deep margin fragments biopsies)? .                                                  | PATHOLOGY FEATURE              | (S3g.37)  |
| -1.56    | 0.0044 | 21 | is (bisected black focal mild dysplasia noted pending consistent with a recurrence difficult required missing 1.2 mm recommended) . | PATHOLOGY FEATURE              | (S3g.38)  |
| -1.56    | 0.0044 | 21 | the (right black inked medial surgical distal tracheal proximal) margin                                                             |                                | (S3g.39)  |
| -1.95    | 0.0044 | 13 | of (three the one two malignancy . 0.2 . . slice) 3                                                                                 |                                | (S3g.40)  |
| -1.95    | 0.0044 | 13 | of (moderately metastatic) moderate to poorly? differentiated? , keratinising? squamous cell carcinoma                              | PATHOLOGY FEATURE              | (S3g.41)  |
| -1.95    | 0.0044 | 13 | HPV (studies genotypes) :? P16 immunohistochemistry :? Negative                                                                     | HPV STATUS                     | (S3g.42)  |
| -1.67    | 0.0049 | 17 | mm (. right deep anterior medial superior thick , extending punch biopsy) to                                                        | TUMOUR LOCATION (Type IIIB MD) | (S3g.43)  |
| -2.22    | 0.0053 | 11 | Labelled . (medial tongue posterior margin total laryngectomy larynx subtotal glossectomy) . , the specimen consists of             | SITE                           | (S3g.44)  |
| -2.22    | 0.0053 | 11 | Labelled . (right vocal cord medial tongue total laryngectomy larynx subtotal glossectomy) . , the                                  | SITE                           | (S3g.45)  |
| -2.22    | 0.0053 | 11 | There is no evidence of? (in situ high grade dysplasia)? or? invasive                                                               | PATHOLOGY FEATURE              | (S3g.46)  |
| -2.22    | 0.0053 | 11 | of skin to? a (6 x depth of)? 3                                                                                                     |                                | (S3g.47)  |
| -2.59    | 0.0058 | 8  | soft tissue margin? ;                                                                                                               |                                | (S3g.48)  |
| -2.59    | 0.0058 | 8  | evidence of high grade dysplasia or? invasive malignancy .                                                                          | PATHOLOGY FEATURE              | (S3g.49)  |

| Log (OR) | P      | N  | Pattern                                                                                           | Comments                       | Crossref. |
|----------|--------|----|---------------------------------------------------------------------------------------------------|--------------------------------|-----------|
| -2.59    | 0.0058 | 8  | 3 :? (. Labelled)? . Left                                                                         |                                | (S3g.50)  |
| -2.59    | 0.0058 | 8  | SUMMARY 1 .? (: . ) Left                                                                          |                                | (S3g.51)  |
| -2.59    | 0.0058 | 8  | a (6 x depth of) 3                                                                                |                                | (S3g.52)  |
| -2.59    | 0.0058 | 8  | no (invasive malignancy dysplasia perineural invasion significant change) .                       | PATHOLOGY FEATURE              | (S3g.53)  |
| -2.59    | 0.0058 | 8  | of (submandibular gland resection are clear of)? (the lesion margins)? ;                          |                                | (S3g.54)  |
| -2.59    | 0.0058 | 8  | one (end transverse section edge) of the                                                          |                                | (S3g.55)  |
| -1.60    | 0.006  | 19 | The (base excision central portion focus regions presence edge remainder outside) of              | SITE (Type IIIB MD)            | (S3g.56)  |
| -1.78    | 0.0065 | 15 | high grade dysplasia? (risk HPV genotypes : Negative or invasive malignancy)? .                   | HPV STATUS, PATHOLOGY FEATURE  | (S3g.57)  |
| -2.98    | 0.0083 | 5  | the closest (transverse peripheral)? margin                                                       |                                | (S3g.58)  |
| -2.98    | 0.0083 | 5  | : Labelled . (deep medial posterior) margin . , the specimen                                      | TUMOUR LOCATION (Type IIIB MD) | (S3g.59)  |
| -2.98    | 0.0083 | 5  | HPV studies :? P16 immunohistochemistry : Negative In situ                                        | HPV STATUS                     | (S3g.60)  |
| -2.98    | 0.0083 | 5  | are clear (of from) the                                                                           |                                | (S3g.61)  |
| -2.98    | 0.0083 | 5  | consists of (a two pale tan biopsies ,) 4                                                         |                                | (S3g.62)  |
| -2.98    | 0.0083 | 5  | punch biopsy of skin? to a depth                                                                  | TUMOUR LOCATION (Type IIIB MD) | (S3g.63)  |
| -2.98    | 0.0083 | 5  | with (high low) grade                                                                             |                                | (S3g.64)  |
| -2.98    | 0.0083 | 5  | well differentiated squamous cell carcinoma?                                                      | PATHOLOGY FEATURE              | (S3g.65)  |
| -2.98    | 0.0083 | 5  | 3 (mm o.clock) to                                                                                 |                                | (S3g.66)  |
| -2.98    | 0.0083 | 5  | . lesion? (right left) posterior                                                                  | TUMOUR LOCATION (Type IIIB MD) | (S3g.67)  |
| -2.98    | 0.0083 | 5  | and the? underlying skeletal                                                                      |                                | (S3g.68)  |
| -2.98    | 0.0083 | 5  | are (clear from the biopsies of moderately differentiated , keratinising squamous cell) carcinoma | PATHOLOGY FEATURE              | (S3g.69)  |
| -2.98    | 0.0083 | 5  | Both (ends negative) .                                                                            |                                | (S3g.70)  |
| -2.98    | 0.0083 | 5  | of skin to? a depth of? 4                                                                         |                                | (S3g.71)  |
| -2.98    | 0.0083 | 5  | the (submandibular gland appearances) are                                                         |                                | (S3g.72)  |
| -1.40    | 0.0099 | 22 | differentiated ,? (invasive keratinizing keratinising) squamous cell carcinoma                    | PATHOLOGY FEATURE              | (S3g.73)  |

**Table S3:** Full list of features listed mined by TEPAPA (Pathology reports) – (Cont'd)

**Table S3(h):** Negative binary features (regular expressions) with sequence-level annotation using UMLS vocabulary

| Log (OR) | P                    | N  | Pattern                                                                                                                                                                                                                                                                                                                          | Comments                                            | Crossref. |
|----------|----------------------|----|----------------------------------------------------------------------------------------------------------------------------------------------------------------------------------------------------------------------------------------------------------------------------------------------------------------------------------|-----------------------------------------------------|-----------|
| -3.98    | 1.1×10 <sup>-5</sup> | 11 | of (two pale tan biopsies , slice skin to)? a?<br>depth of? 4                                                                                                                                                                                                                                                                    |                                                     | (S3h.1)   |
| -3.24    | 9.7×10 <sup>-5</sup> | 12 | The paraffin? sections of                                                                                                                                                                                                                                                                                                        |                                                     | (S3h.2)   |
| -3.69    | 0.00011              | 9  | consists of (three a one two)? 3 mm                                                                                                                                                                                                                                                                                              |                                                     | (S3h.3)   |
| -2.08    | 0.00012              | 39 | the (tumour right largest bisected salivary gland <br>surface squamous epithelium carcinoma <br>maximum dimension bone margins nodes <br>lesion report is missing biopsy multiple sections<br>examined stroma lip surgical margin floor of<br>mouth thyroid cartilage following features other<br>end diagnosis opposite side) . |                                                     | (S3h.4)   |
| -2.21    | 0.00014              | 21 | The (sections base central portion lesion is 2<br>mm clear cut surface edge remainder outside) of<br>the                                                                                                                                                                                                                         | SITE (Type IIIB MD)                                 | (S3h.5)   |
| -2.66    | 0.00016              | 14 | for (high risk HPV genotypes : Negative <br>decalcification) prior to further dissection? .                                                                                                                                                                                                                                      | HPV STATUS,<br>TUMOUR<br>LOCATION (Type<br>IIIB MD) | (S3h.6)   |
| -3.09    | 0.00029              | 11 | , (invasive moderately differentiated keratinising)<br>squamous cell carcinoma                                                                                                                                                                                                                                                   | PATHOLOGY<br>FEATURE                                | (S3h.7)   |
| -3.54    | 0.00035              | 8  | . , the specimen consists of (9 x three one two)?<br>3                                                                                                                                                                                                                                                                           |                                                     | (S3h.8)   |
| -3.54    | 0.00035              | 8  | medial tongue? (. , aspect of) the                                                                                                                                                                                                                                                                                               | SITE                                                | (S3h.9)   |
| -1.94    | 0.00039              | 26 | the (level right half base larger piece surface <br>region margins majority right side edge edges <br>proximal margin request shape possibility rest <br>periphery) of                                                                                                                                                           | SITE (Type IIIB MD)                                 | (S3h.10)  |
| -2.06    | 0.00071              | 17 | the (lateral inferior medial posterior) aspect                                                                                                                                                                                                                                                                                   | TUMOUR<br>LOCATION (Type<br>IIIB MD)                | (S3h.11)  |
| -2.23    | 0.00074              | 15 | with (squamous cell carcinoma minor salivary<br>gland cyst formation previous surgery mild<br>chronic inflammation mild dysplasia prominent<br>nucleoli) .                                                                                                                                                                       | PATHOLOGY<br>FEATURE                                | (S3h.12)  |
| -1.66    | 0.0014               | 28 | sections (of from) the                                                                                                                                                                                                                                                                                                           |                                                     | (S3h.13)  |
| -2.09    | 0.0018               | 14 | of (tumour one punch biopsy two pale tan<br>biopsies soft tissue moderately differentiated <br>multiple unoriented pieces of fibrofatty tissue <br>nose mucosal tissue) ,                                                                                                                                                        | TUMOUR<br>LOCATION (Type<br>IIIA MD)                | (S3h.14)  |
| -1.81    | 0.0021               | 18 | . (lymph nodes .  for high risk HPV genotypes :<br>Negative dysplasia margins Alarm continuation<br>sequencing error) .                                                                                                                                                                                                          | HPV STATUS,<br>PATHOLOGY<br>FEATURE                 | (S3h.15)  |
| -2.77    | 0.0022               | 9  | 12 o'clock superior? (. , and margin of) the                                                                                                                                                                                                                                                                                     |                                                     | (S3h.16)  |
| -2.37    | 0.0023               | 12 | consists of (three a one two)? 3                                                                                                                                                                                                                                                                                                 |                                                     | (S3h.17)  |
| -1.74    | 0.0028               | 20 | in (the stroma extent an addendum report black <br>depth -situ thickness diameter length) .                                                                                                                                                                                                                                      |                                                     | (S3h.18)  |
| -3.18    | 0.0029               | 6  | 1 : (Right level IIb . Right vocal cord . Deep<br>medial margin) .                                                                                                                                                                                                                                                               | NODAL, SITE                                         | (S3h.19)  |
| -3.18    | 0.0029               | 6  | the (specimen show carcinoma with lesion                                                                                                                                                                                                                                                                                         |                                                     | (S3h.20)  |



| Log (OR) | P      | N  | Pattern                                                                                                                                                                                                                                                              | Comments                             | Crossref. |
|----------|--------|----|----------------------------------------------------------------------------------------------------------------------------------------------------------------------------------------------------------------------------------------------------------------------|--------------------------------------|-----------|
|          |        |    | appears complete and) the                                                                                                                                                                                                                                            |                                      |           |
| -3.18    | 0.0029 | 6  | tissue (: No evidence of malignancy . ,) 6                                                                                                                                                                                                                           |                                      | (S3h.21)  |
| -3.18    | 0.0029 | 6  | studies :? (P16 immunohistochemistry :<br>Negative In situ hybridisation for high risk HPV) .                                                                                                                                                                        | HPV STATUS                           | (S3h.22)  |
| -3.18    | 0.0029 | 6  | of (tumour the submandibular gland resection)<br>are                                                                                                                                                                                                                 |                                      | (S3h.23)  |
| -3.18    | 0.0029 | 6  | of (the resection are clear) (lesion appears<br>complete and right side)? of? the                                                                                                                                                                                    |                                      | (S3h.24)  |
| -3.18    | 0.0029 | 6  | medial tongue? . , the specimen                                                                                                                                                                                                                                      | SITE                                 | (S3h.25)  |
| -3.18    | 0.0029 | 6  | a (small large) area                                                                                                                                                                                                                                                 |                                      | (S3h.26)  |
| -3.18    | 0.0029 | 6  | P16 immunohistochemistry : Negative In situ<br>hybridisation .? (and HPV Ventana INFORM)?<br>ISH                                                                                                                                                                     | HPV STATUS                           | (S3h.27)  |
| -3.18    | 0.0029 | 6  | 4 (: .) . Left                                                                                                                                                                                                                                                       |                                      | (S3h.28)  |
| -3.18    | 0.0029 | 6  | 2A - (four possible five) (lymph nodes nodes) ;<br>2B -                                                                                                                                                                                                              |                                      | (S3h.29)  |
| -1.92    | 0.003  | 16 | invasion is (identified present seen not seen) .                                                                                                                                                                                                                     |                                      | (S3h.30)  |
| -1.92    | 0.003  | 16 | of (three one two)? 3 mm                                                                                                                                                                                                                                             |                                      | (S3h.31)  |
| -1.49    | 0.0042 | 34 | 2 mm (of extranodal spread pale biopsy from the<br>deep margin fragments biopsies)? .                                                                                                                                                                                | PATHOLOGY<br>FEATURE                 | (S3h.32)  |
| -1.56    | 0.0044 | 21 | of (tumour two lymph nodes extranodal spread <br>dysplasia soft tissue squamous mucosa <br>lymphocytes muscle floor of mouth thyroid pink<br>tissue oral type with subepithelial stroma and<br>skeletal muscle malignant cells poorly<br>differentiated carcinoma) . | PATHOLOGY<br>FEATURE                 | (S3h.33)  |
| -1.95    | 0.0044 | 13 | Block 6A -? one? (bisected possible)? (two .<br>lymph nodes node)? (; and) 6B-                                                                                                                                                                                       |                                      | (S3h.34)  |
| -1.95    | 0.0044 | 13 | HPV (studies genotypes) :? P16<br>immunohistochemistry :? Negative                                                                                                                                                                                                   | HPV STATUS                           | (S3h.35)  |
| -1.95    | 0.0044 | 13 | perineural space? invasion is (identified present <br>seen) .                                                                                                                                                                                                        |                                      | (S3h.36)  |
| -1.67    | 0.0049 | 17 | lateral tongue? (. , the specimen consists <br>aspect) of                                                                                                                                                                                                            | SITE                                 | (S3h.37)  |
| -1.67    | 0.0049 | 17 | mm (. right deep anterior medial superior thick ,<br>extending punch biopsy) to                                                                                                                                                                                      | TUMOUR<br>LOCATION (Type<br>IIIB MD) | (S3h.38)  |
| -2.22    | 0.0053 | 11 | of skin to? a (6 x depth of)? 3                                                                                                                                                                                                                                      |                                      | (S3h.39)  |
| -2.22    | 0.0053 | 11 | There is no evidence of? (high grade dysplasia <br>in situ)? or? invasive                                                                                                                                                                                            | PATHOLOGY<br>FEATURE                 | (S3h.40)  |
| -2.59    | 0.0058 | 8  | a (6 x depth of) 3                                                                                                                                                                                                                                                   |                                      | (S3h.41)  |
| -2.59    | 0.0058 | 8  | sections of (the salivary gland) 3 and 9 o'clock?<br>(submandibular gland are unremarkable ends)?<br>respectively? .                                                                                                                                                 |                                      | (S3h.42)  |
| -2.59    | 0.0058 | 8  | no (invasive malignancy dysplasia perineural<br>invasion significant change) .                                                                                                                                                                                       | PATHOLOGY<br>FEATURE                 | (S3h.43)  |
| -2.59    | 0.0058 | 8  | one (end edge transverse section) of the                                                                                                                                                                                                                             |                                      | (S3h.44)  |
| -2.59    | 0.0058 | 8  | of (submandibular gland margins resection are<br>clear of)? the lesion? ;                                                                                                                                                                                            |                                      | (S3h.45)  |
| -1.60    | 0.006  | 19 | The (base excision central portion focus regions <br>presence edge remainder outside) of                                                                                                                                                                             | SITE (Type IIIB MD)                  | (S3h.46)  |
| -1.39    | 0.0071 | 26 | and (9 o'clock ends respectively fatty tissue all                                                                                                                                                                                                                    | PATHOLOGY                            | (S3h.47)  |

| Log (OR) | P      | N  | Pattern                                                                                                                                                                                         | Comments          | Crossref. |
|----------|--------|----|-------------------------------------------------------------------------------------------------------------------------------------------------------------------------------------------------|-------------------|-----------|
|          |        |    | embedded subepithelial stroma sinus cartilage lymphovascular invasion fibrosis plasma cells chronic inflammation CK5.6 hyperkeratosis radiotherapy mild chronic inflammation venous invasion) . | FEATURE           |           |
| -2.98    | 0.0083 | 5  | - (two transverse sections longitudinal sections shave) of                                                                                                                                      |                   | (S3h.48)  |
| -2.98    | 0.0083 | 5  | the closest (transverse peripheral)? margin                                                                                                                                                     |                   | (S3h.49)  |
| -2.98    | 0.0083 | 5  | . . (Left level 4 Larynx Right vocal cord Left vocal cord) .                                                                                                                                    | NODAL, SITE       | (S3h.50)  |
| -2.98    | 0.0083 | 5  | right neck dissection? :                                                                                                                                                                        |                   | (S3h.51)  |
| -2.98    | 0.0083 | 5  | of moderately differentiated , keratinising? squamous cell carcinoma                                                                                                                            | PATHOLOGY FEATURE | (S3h.52)  |
| -2.98    | 0.0083 | 5  | consists of (a two pale tan biopsies ,) 4                                                                                                                                                       |                   | (S3h.53)  |
| -2.98    | 0.0083 | 5  | are clear (of from) the                                                                                                                                                                         |                   | (S3h.54)  |
| -2.98    | 0.0083 | 5  | the (submandibular gland appearances) are                                                                                                                                                       |                   | (S3h.55)  |
| -2.98    | 0.0083 | 5  | studies :? P16 immunohistochemistry : Negative                                                                                                                                                  | HPV STATUS        | (S3h.56)  |
| -2.98    | 0.0083 | 5  | punch biopsy of skin? to a depth                                                                                                                                                                | TUMOUR LOCATION   | (S3h.57)  |
| -2.98    | 0.0083 | 5  | both (ends negative) .                                                                                                                                                                          |                   | (S3h.58)  |
| -2.98    | 0.0083 | 5  | and the? underlying skeletal muscle                                                                                                                                                             |                   | (S3h.59)  |
| -2.98    | 0.0083 | 5  | 3 (mm o.clock) to                                                                                                                                                                               |                   | (S3h.60)  |
| -1.40    | 0.0099 | 22 | . (No evidence of malignancy medial tongue No tumour larynx Larynx total laryngectomy subtotal glossectomy Right vocal cord Left vocal cord) .                                                  | SITE              | (S3h.61)  |

Note: In Tables S3(c), (d), (g), and (h), regular expressions that group only cardinal numbers as options [e.g. "size (15|20|30|...) mm"] are not shown for brevity.

**Table S4:** Full list of features listed mined by TEPAPA (FDG-PET/CT reports)**Table S4(a):** Positive binary features (n-gram) without sequence-level annotation

| Log (OR) | P                    | N  | Pattern                                | Comments                          | Crossref. |
|----------|----------------------|----|----------------------------------------|-----------------------------------|-----------|
| 2.95     | 7.6×10 <sup>-7</sup> | 34 | <b>base</b>                            | SITE (Type IIIA MD)               | (S4a.1)   |
| 4.03     | 1.2×10 <sup>-6</sup> | 22 | <b>tonsillar</b>                       | SITE                              | (S4a.2)   |
| 3.30     | 0.00049              | 14 | <b>vallecula</b>                       | SITE                              | (S4a.3)   |
| 1.79     | 0.0015               | 30 | <b>bowel</b>                           |                                   | (S4a.4)   |
| 2.64     | 0.0029               | 16 | <b>tonsil</b>                          | SITE                              | (S4a.5)   |
| 2.54     | 0.0033               | 15 | <b>Previous</b>                        |                                   | (S4a.6)   |
| 2.98     | 0.005                | 11 | <b>FDG avid pulmonary nodule</b>       | METASTATIC DISEASE (Type IIIB MD) | (S4a.7)   |
| 2.98     | 0.005                | 11 | <b>No FDG avid pulmonary</b>           | METASTATIC DISEASE                | (S4a.8)   |
| 2.98     | 0.005                | 11 | <b>hypermetabolism in</b>              |                                   | (S4a.9)   |
| 2.98     | 0.005                | 11 | <b>remaining oropharynx</b>            |                                   | (S4a.10)  |
| 2.86     | 0.0051               | 10 | <b>Primary site : There</b>            |                                   | (S4a.11)  |
| 2.01     | 0.0054               | 18 | <b>No pulmonary</b>                    |                                   | (S4a.12)  |
| 2.01     | 0.0054               | 18 | <b>soft tissue mass</b>                |                                   | (S4a.13)  |
| 2.43     | 0.0062               | 14 | <b>oropharyngeal</b>                   |                                   | (S4a.14)  |
| 1.48     | 0.0063               | 46 | <b>or pleural</b>                      |                                   | (S4a.15)  |
| 1.52     | 0.0068               | 27 | <b>, pancreas</b>                      |                                   | (S4a.16)  |
| 1.52     | 0.0068               | 27 | <b>lesion is detected</b>              |                                   | (S4a.17)  |
| 1.75     | 0.0077               | 21 | <b>pancreas ,</b>                      |                                   | (S4a.18)  |
| 1.34     | 0.0089               | 40 | <b>tongue</b>                          | SITE                              | (S4a.19)  |
| 1.59     | 0.0092               | 58 | <b>REPORT</b>                          |                                   | (S4a.20)  |
| 2.73     | 0.0099               | 9  | <b>lesion is demonstrated</b>          |                                   | (S4a.21)  |
| 2.73     | 0.0099               | 9  | <b>lymphadenopathy is demonstrated</b> |                                   | (S4a.22)  |

**Table S4(b):** Positive binary features (n-gram) with sequence-level annotation using UMLS vocabulary

| Log (OR) | P       | N  | Pattern                          | Comments                          | Crossref. |
|----------|---------|----|----------------------------------|-----------------------------------|-----------|
| 3.02     | 0.00014 | 20 | <b>tonsillar</b>                 | SITE                              | (S4b.1)   |
| 3.30     | 0.00049 | 14 | <b>vallecula</b>                 | SITE                              | (S4b.2)   |
| 2.74     | 0.0014  | 17 | <b>base of tongue</b>            | SITE                              | (S4b.3)   |
| 2.54     | 0.0033  | 15 | <b>Previous</b>                  |                                   | (S4b.4)   |
| 1.85     | 0.004   | 22 | <b>tongue base</b>               | SITE                              | (S4b.5)   |
| 2.98     | 0.005   | 11 | <b>loops</b>                     |                                   | (S4b.6)   |
| 2.98     | 0.005   | 11 | <b>hypermetabolism in</b>        |                                   | (S4b.7)   |
| 2.98     | 0.005   | 11 | <b>FDG avid pulmonary nodule</b> | METASTATIC DISEASE (Type IIIB MD) | (S4b.8)   |
| 2.98     | 0.005   | 11 | <b>remaining oropharynx</b>      |                                   | (S4b.9)   |
| 2.86     | 0.0051  | 10 | <b>Primary site : There</b>      |                                   | (S4b.10)  |
| 2.01     | 0.0054  | 18 | <b>soft tissue mass</b>          |                                   | (S4b.11)  |
| 2.43     | 0.0062  | 14 | <b>oropharyngeal</b>             |                                   | (S4b.12)  |
| 1.52     | 0.0068  | 27 | <b>, pancreas</b>                |                                   | (S4b.13)  |
| 1.52     | 0.0068  | 27 | <b>lesion is detected</b>        |                                   | (S4b.14)  |

**Table S4:** Full list of features listed mined by TEPAPA (FDG-PET/CT reports) - (Cont'd)

**Table S4(c):** Positive binary features (regular expressions) without sequence-level annotation

| Log (OR) | P                  | N  | Pattern                                                                                                                                                                                                                       | Comments                             | Crossref. |
|----------|--------------------|----|-------------------------------------------------------------------------------------------------------------------------------------------------------------------------------------------------------------------------------|--------------------------------------|-----------|
| 3.29     | 2×10 <sup>-5</sup> | 23 | No FDG avid? pulmonary (nodules nodule) or pleural                                                                                                                                                                            | METASTATIC DISEASE                   | (S4c.1)   |
| 1.94     | 0.00031            | 35 | the (body nasopharynx vallecula epiglottis retroperitoneum skeleton abdomen , pelvis inguinal regions primary site current study oropharynx hyoid bone thorax pharyngeal mucosal space uterus solid abdominal organs trunk) . | SITE, TUMOUR LOCATION (Type IIIA MD) | (S4c.2)   |
| 3.20     | 0.001              | 13 | avid pulmonary (nodules nodule) or pleural                                                                                                                                                                                    | METASTATIC DISEASE (Type IIIB MD)    | (S4c.3)   |
| 3.20     | 0.001              | 13 | is (identified detected) . both? on                                                                                                                                                                                           |                                      | (S4c.4)   |
| 2.29     | 0.0012             | 21 | in the (right cubital fossa body base of tongue skeleton abdomen , pelvis inguinal regions current study thorax trunk) .                                                                                                      | SITE                                 | (S4c.5)   |
| 2.74     | 0.0014             | 17 | base of the? tongue                                                                                                                                                                                                           | SITE                                 | (S4c.6)   |
| 1.75     | 0.0016             | 33 | pulmonary (nodules nodule) or pleural                                                                                                                                                                                         |                                      | (S4c.7)   |
| 1.94     | 0.002              | 23 | pulmonary nodule or pleural? (effusion abnormality)? is                                                                                                                                                                       | METASTATIC DISEASE (Type IIIB MD)    | (S4c.8)   |
| 1.94     | 0.002              | 23 | in the? (the left remaining) oropharynx                                                                                                                                                                                       |                                      | (S4c.9)   |
| 3.09     | 0.0023             | 12 | lesion is (identified detected) . both? on                                                                                                                                                                                    |                                      | (S4c.10)  |
| 3.09     | 0.0023             | 12 | No FDG avid? pulmonary? (nodules nodule)? (or pleural new) abnormality                                                                                                                                                        | METASTATIC DISEASE                   | (S4c.11)  |
| 3.09     | 0.0023             | 12 | avid (4 mm pulmonary) nodule                                                                                                                                                                                                  | METASTATIC DISEASE (Type IIIB MD)    | (S4c.12)  |
| 3.09     | 0.0023             | 12 | bowel (appear unremarkable activity loops) .                                                                                                                                                                                  |                                      | (S4c.13)  |
| 3.09     | 0.0023             | 12 | right (tonsillar tongue base tonsil) SCC                                                                                                                                                                                      | SITE                                 | (S4c.14)  |
| 1.79     | 0.0026             | 26 | with (: >90% Probable OR Probably : approx metastasis altered usage metastatic disease central necrosis high-grade malignancy unknown primary) .                                                                              |                                      | (S4c.15)  |
| 2.20     | 0.0026             | 20 | No (FDG avid new)? pulmonary nodule                                                                                                                                                                                           | METASTATIC DISEASE                   | (S4c.16)  |
| 2.54     | 0.0033             | 15 | the (right left)? base of                                                                                                                                                                                                     | SITE (Type IIIA MD)                  | (S4c.17)  |
| 2.54     | 0.0033             | 15 | No pulmonary (nodules nodule) or                                                                                                                                                                                              |                                      | (S4c.18)  |
| 1.61     | 0.0037             | 28 | the (vallecula mediastinum retroperitoneum midline mandible abdomen previous study axillary probability of that diagnosis) ,                                                                                                  | SITE                                 | (S4c.19)  |
| 1.61     | 0.0037             | 28 | lymphadenopathy is (identified detected demonstrated seen) in                                                                                                                                                                 |                                      | (S4c.20)  |
| 1.61     | 0.0037             | 28 | There is (no an intensely physiological mild marked) FDG                                                                                                                                                                      |                                      | (S4c.21)  |
| 1.85     | 0.004              | 22 | or enlarged? cervical? (lymph node pleural) (effusion abnormality)? is                                                                                                                                                        |                                      | (S4c.22)  |
| 2.98     | 0.005              | 11 | the (right left) tonsillar                                                                                                                                                                                                    | SITE                                 | (S4c.23)  |
| 2.98     | 0.005              | 11 | for (staging restaging) FDG-PET                                                                                                                                                                                               |                                      | (S4c.24)  |

| Log (OR) | P      | N  | Pattern                                                                                                                                                 | Comments                          | Crossref. |
|----------|--------|----|---------------------------------------------------------------------------------------------------------------------------------------------------------|-----------------------------------|-----------|
| 2.98     | 0.005  | 11 | the (neck , injection site)? (previous PET CT scan performed particularly)? in                                                                          |                                   | (S4c.25)  |
| 2.98     | 0.005  | 11 | site (in on) the                                                                                                                                        |                                   | (S4c.26)  |
| 2.86     | 0.0051 | 10 | is (identified detected)? (. both on complete) metabolic                                                                                                |                                   | (S4c.27)  |
| 2.86     | 0.0051 | 10 | and (CT appearances within in at inferiorly to  extends past) the                                                                                       |                                   | (S4c.28)  |
| 2.86     | 0.0051 | 10 | spleen , (kidneys and adrenals ,)? pancreas                                                                                                             |                                   | (S4c.29)  |
| 2.86     | 0.0051 | 10 | and bowel (appear unremarkable loops) .                                                                                                                 |                                   | (S4c.30)  |
| 2.86     | 0.0051 | 10 | No FDG avid pulmonary (nodules nodule) or                                                                                                               | METASTATIC DISEASE                | (S4c.31)  |
| 2.01     | 0.0054 | 18 | nodule or pleural (effusion abnormality) is                                                                                                             |                                   | (S4c.32)  |
| 2.43     | 0.0062 | 14 | : No FDG avid? pulmonary                                                                                                                                | METASTATIC DISEASE                | (S4c.33)  |
| 2.43     | 0.0062 | 14 | in the (mediastinum lungs , liver , axillae  proximal appendicular) or? (mediastinum  retroperitoneum axial)? skeleton? or elsewhere? .                 |                                   | (S4c.34)  |
| 2.43     | 0.0062 | 14 | for (staging restaging)? (a progress PET CT  FDG-PET) scan                                                                                              |                                   | (S4c.35)  |
| 2.43     | 0.0062 | 14 | in the? remaining? oropharynx , oral cavity ,? nasopharynx ,? hypopharynx                                                                               |                                   | (S4c.36)  |
| 2.43     | 0.0062 | 14 | the remaining? oropharynx ,                                                                                                                             |                                   | (S4c.37)  |
| 2.73     | 0.0099 | 9  | : No FDG avid cervical? (lymphadenopathy  suspicious osseous lesion new finding) is                                                                     | METASTATIC DISEASE                | (S4c.38)  |
| 2.73     | 0.0099 | 9  | kidneys and (bowel loops urinary bladder are of normal appearance) .                                                                                    |                                   | (S4c.39)  |
| 2.73     | 0.0099 | 9  | No intracranial? (space space-occupying)? (suspicious osseous -occupying occupying)? lesion is detected . both? on                                      | METASTATIC DISEASE                | (S4c.40)  |
| 2.73     | 0.0099 | 9  | avid cervical? (lymphadenopathy mucosal) , subcutaneous? or cutaneous lesion? is demonstrated                                                           | TUMOUR LOCATION (Type IIIA MD)    | (S4c.41)  |
| 2.73     | 0.0099 | 9  | avid pulmonary? (nodules nodule cutaneous)? or pleural? (effusion destructive bone  subcutaneous)? lesion? is? (identified detected  noted effusions) . | METASTATIC DISEASE (Type IIIB MD) | (S4c.42)  |
| 2.73     | 0.0099 | 9  | cutaneous or subcutaneous? lesion is (detected demonstrated)? (identified in the head and neck) .                                                       |                                   | (S4c.43)  |
| 2.73     | 0.0099 | 9  | is (identified detected) elsewhere? . (M0 both on metabolic and anatomic grounds) .                                                                     | STAGE                             | (S4c.44)  |
| 2.73     | 0.0099 | 9  | the (right left remaining) oropharynx                                                                                                                   |                                   | (S4c.45)  |

**Table S4:** Full list of features listed mined by TEPAPA (FDG-PET/CT reports) – (Cont'd)

**Table S4(d):** Positive binary features (regular expressions) with sequence-level annotation using UMLS vocabulary

| Log (OR) | P       | N  | Pattern                                                                                                                                                                                                                                                                   | Comments                             | Crossref. |
|----------|---------|----|---------------------------------------------------------------------------------------------------------------------------------------------------------------------------------------------------------------------------------------------------------------------------|--------------------------------------|-----------|
| 1.94     | 0.00028 | 38 | the (body nasopharynx vallecula retroperitoneum skeleton PET scan abdomen , pelvis inguinal regions right lower lobe previous scan current study primary site oropharynx base of tongue hyoid bone thorax pharyngeal mucosal space uterus solid abdominal organs trunk) . | SITE, TUMOUR LOCATION (Type IIIB MD) | (S4d.1)   |
| 2.93     | 0.0003  | 19 | avid (pulmonary nodules lytic pulmonary nodule cutaneous) or                                                                                                                                                                                                              | METASTATIC DISEASE (Type IIIA MD)    | (S4d.2)   |
| 3.20     | 0.001   | 13 | No FDG avid? (pulmonary nodules pulmonary nodule) or pleural                                                                                                                                                                                                              | METASTATIC DISEASE                   | (S4d.3)   |
| 3.20     | 0.001   | 13 | is (identified detected) . both? on                                                                                                                                                                                                                                       |                                      | (S4d.4)   |
| 2.74     | 0.0014  | 17 | , adrenal glands ,? spleen , adrenal glands ,? gallbladder ,? pancreas                                                                                                                                                                                                    |                                      | (S4d.5)   |
| 1.94     | 0.002   | 23 | in the? (the left remaining) oropharynx                                                                                                                                                                                                                                   |                                      | (S4d.6)   |
| 3.09     | 0.0023  | 12 | lesion is (identified detected) . both? on                                                                                                                                                                                                                                |                                      | (S4d.7)   |
| 3.09     | 0.0023  | 12 | No (pulmonary nodules FDG avid)? pulmonary nodule? (or pleural new) abnormality                                                                                                                                                                                           | METASTATIC DISEASE                   | (S4d.8)   |
| 2.20     | 0.0026  | 20 | FDG avid (pulmonary nodules lytic pulmonary nodule cutaneous)? or                                                                                                                                                                                                         | METASTATIC DISEASE (Type IIIA MD)    | (S4d.9)   |
| 2.64     | 0.0029  | 16 | right (. vallecula tonsil SCC cubital fossa) .                                                                                                                                                                                                                            | SITE                                 | (S4d.10)  |
| 1.61     | 0.0037  | 28 | lymphadenopathy is (identified detected demonstrated seen) in                                                                                                                                                                                                             |                                      | (S4d.11)  |
| 1.61     | 0.0037  | 28 | There is (no an intensely physiological mild marked) FDG                                                                                                                                                                                                                  |                                      | (S4d.12)  |
| 2.98     | 0.005   | 11 | No intracranial space? (suspicious osseous -occupying occupying) lesion is (identified detected) . both? on                                                                                                                                                               | METASTATIC DISEASE                   | (S4d.13)  |
| 2.98     | 0.005   | 11 | the (neck , injection site)? (previous PET CT scan performed particularly)? in                                                                                                                                                                                            |                                      | (S4d.14)  |
| 2.98     | 0.005   | 11 | for (staging restaging) FDG-PET scan                                                                                                                                                                                                                                      |                                      | (S4d.15)  |
| 2.98     | 0.005   | 11 | normal (-appearing appearing) liver                                                                                                                                                                                                                                       |                                      | (S4d.16)  |
| 2.86     | 0.0051  | 10 | is (identified detected)? (. both on complete) metabolic                                                                                                                                                                                                                  |                                      | (S4d.17)  |
| 2.86     | 0.0051  | 10 | spleen , (kidneys and adrenals ,)? pancreas                                                                                                                                                                                                                               |                                      | (S4d.18)  |
| 2.86     | 0.0051  | 10 | bowel (activity loops) .                                                                                                                                                                                                                                                  |                                      | (S4d.19)  |
| 2.86     | 0.0051  | 10 | for (staging restaging) FDG-PET scan .                                                                                                                                                                                                                                    |                                      | (S4d.20)  |
| 2.01     | 0.0054  | 18 | pulmonary nodule or (pleural effusion pleural abnormality) is                                                                                                                                                                                                             |                                      | (S4d.21)  |
| 2.43     | 0.0062  | 14 | the remaining? oropharynx ,                                                                                                                                                                                                                                               |                                      | (S4d.22)  |
| 2.43     | 0.0062  | 14 | in the? remaining? oropharynx , oral cavity ,? nasopharynx ,? hypopharynx                                                                                                                                                                                                 |                                      | (S4d.23)  |
| 2.43     | 0.0062  | 14 | , in keeping with? a? (non high) -                                                                                                                                                                                                                                        |                                      | (S4d.24)  |
| 2.43     | 0.0062  | 14 | No FDG avid (pulmonary nodules pulmonary                                                                                                                                                                                                                                  | METASTATIC                           | (S4d.25)  |

| Log (OR) | P      | N | Pattern                                                                                                                                                                                | Comments                          | Crossref. |
|----------|--------|---|----------------------------------------------------------------------------------------------------------------------------------------------------------------------------------------|-----------------------------------|-----------|
|          |        |   | <b>nodule)? or</b>                                                                                                                                                                     | DISEASE                           |           |
| 2.73     | 0.0099 | 9 | <b>: No FDG avid cervical? (lymphadenopathy  suspicious osseous lesion new finding) is</b>                                                                                             | METASTATIC DISEASE                | (S4d.26)  |
| 2.73     | 0.0099 | 9 | <b>FDG avid (pulmonary nodules pulmonary nodule cutaneous)? or (pleural effusion pleural effusions destructive bone lesion subcutaneous lesion) is? (identified detected noted)? .</b> | METASTATIC DISEASE (Type IIIA MD) | (S4d.27)  |
| 2.73     | 0.0099 | 9 | <b>FDG avid cervical? (lymphadenopathy  mucosal) , subcutaneous? or cutaneous lesion? is demonstrated</b>                                                                              | TUMOUR LOCATION (Type IIIB MD)    | (S4d.28)  |
| 2.73     | 0.0099 | 9 | <b>kidneys and (bowel loops urinary bladder are of normal appearance) .</b>                                                                                                            |                                   | (S4d.29)  |
| 2.73     | 0.0099 | 9 | <b>No (other new)? pulmonary nodule or pleural? abnormality is identified</b>                                                                                                          | METASTATIC DISEASE (Type IIIA MD) | (S4d.30)  |
| 2.73     | 0.0099 | 9 | <b>is (identified detected) elsewhere? . (M0 both on metabolic and anatomic grounds) .</b>                                                                                             | STAGE                             | (S4d.31)  |
| 2.73     | 0.0099 | 9 | <b>pulmonary nodules or pleural abnormality? (or pleural effusions are detected) .</b>                                                                                                 | METASTATIC DISEASE (Type IIIA MD) | (S4d.32)  |
| 2.73     | 0.0099 | 9 | <b>right (level IIA retropharyngeal tonsil SCC tonsil  paratracheal) and</b>                                                                                                           | NODAL, SITE                       | (S4d.33)  |
| 2.73     | 0.0099 | 9 | <b>the (right left remaining) oropharynx</b>                                                                                                                                           |                                   | (S4d.34)  |
| 2.73     | 0.0099 | 9 | <b>the (superior apical) segment</b>                                                                                                                                                   |                                   | (S4d.35)  |

**Table S4(e):** Negative binary features (n-gram) without sequence-level annotation

| Log (OR) | P      | N  | Pattern                     | Comments | Crossref. |
|----------|--------|----|-----------------------------|----------|-----------|
| -3.23    | 0.0026 | 6  | <b>on the background of</b> |          | (S4e.1)   |
| -3.23    | 0.0026 | 6  | <b>and anterior</b>         |          | (S4e.2)   |
| -2.64    | 0.0049 | 8  | <b>Distant Disease :</b>    |          | (S4e.3)   |
| -3.02    | 0.0074 | 5  | <b>which may</b>            |          | (S4e.4)   |
| -3.02    | 0.0074 | 5  | <b>subglottic</b>           |          | (S4e.5)   |
| -1.39    | 0.0083 | 36 | <b>intense</b>              |          | (S4e.6)   |
| -1.84    | 0.0088 | 12 | <b>moderately</b>           |          | (S4e.7)   |

**Table S4(f):** Negative binary features (n-gram) with sequence-level annotation using UMLS vocabulary

| Log (OR) | P      | N  | Pattern                                                       | Comments | Crossref. |
|----------|--------|----|---------------------------------------------------------------|----------|-----------|
| -3.23    | 0.0026 | 6  | <b>on the background of</b>                                   |          | (S4f.1)   |
| -2.64    | 0.0049 | 8  | <b>Distant Disease :</b>                                      |          | (S4f.2)   |
| -3.02    | 0.0074 | 5  | <b>and anterior</b>                                           |          | (S4f.3)   |
| -3.02    | 0.0074 | 5  | <b>infiltration</b>                                           |          | (S4f.4)   |
| -3.02    | 0.0074 | 5  | <b>which may</b>                                              |          | (S4f.5)   |
| -3.02    | 0.0074 | 5  | <b>subglottic</b>                                             |          | (S4f.6)   |
| -3.02    | 0.0074 | 5  | <b>- No hypermetabolic/ enlarged lymph nodes are detected</b> | NODAL    | (S4f.7)   |
| -1.39    | 0.0083 | 36 | <b>intense</b>                                                |          | (S4f.8)   |
| -1.84    | 0.0088 | 12 | <b>moderately</b>                                             |          | (S4f.9)   |

**Table S4:** Full list of features listed mined by TEPAPA (FDG-PET/CT reports) – (Cont'd)

**Table S4(g):** Negative binary features (regular expressions) without sequence-level annotation

| Log (OR) | P      | N  | Pattern                                                                                | Comments                       | Crossref. |
|----------|--------|----|----------------------------------------------------------------------------------------|--------------------------------|-----------|
| -1.98    | 0.0014 | 16 | <b>intense (hypermetabolism increased FDG activity) .</b>                              |                                | (S4g.1)   |
| -2.15    | 0.0016 | 14 | <b>is (noted without abnormal intense) hypermetabolism</b>                             |                                | (S4g.2)   |
| -2.64    | 0.0049 | 8  | <b>the (right left true)? vocal cord</b>                                               | SITE                           | (S4g.3)   |
| -2.64    | 0.0049 | 8  | <b>hilar lymph? (nodes node) .</b>                                                     |                                | (S4g.4)   |
| -3.02    | 0.0074 | 5  | <b>- No (hypermetabolic.enlarged hypermetabolic.enlarged) lymph nodes are detected</b> |                                | (S4g.5)   |
| -3.02    | 0.0074 | 5  | <b>the (right left true) vocal</b>                                                     |                                | (S4g.6)   |
| -3.02    | 0.0074 | 5  | <b>nodes (, measuring up are considered more likely) to</b>                            |                                | (S4g.7)   |
| -1.84    | 0.0088 | 12 | <b>the (anterior lateral inferior) aspect</b>                                          | TUMOUR LOCATION (Type IIIB MD) | (S4g.8)   |
| -1.84    | 0.0088 | 12 | <b>anterior (to segment margin aspect) of? the</b>                                     | TUMOUR LOCATION (Type IIIB MD) | (S4g.9)   |

**Table S4(h):** Negative binary features (regular expressions) with sequence-level annotation using UMLS vocabulary

| Log (OR) | P      | N  | Pattern                                                                                                     | Comments                       | Crossref. |
|----------|--------|----|-------------------------------------------------------------------------------------------------------------|--------------------------------|-----------|
| -1.98    | 0.0014 | 16 | <b>intense (hypermetabolism increased FDG activity) .</b>                                                   |                                | (S4h.1)   |
| -2.15    | 0.0016 | 14 | <b>is (noted without abnormal intense) hypermetabolism</b>                                                  |                                | (S4h.2)   |
| -2.64    | 0.0049 | 8  | <b>anterior (to aspect of) the</b>                                                                          | TUMOUR LOCATION (Type IIIB MD) | (S4h.3)   |
| -1.84    | 0.0088 | 12 | <b>the (anterior lateral inferior) aspect</b>                                                               | TUMOUR LOCATION (Type IIIB MD) | (S4h.4)   |
| -1.84    | 0.0088 | 12 | <b>- (No destructive bony lesion . - There)? (CT findings No hypermetabolic. enlarged lymph nodes)? are</b> |                                | (S4h.5)   |
| -1.59    | 0.0092 | 16 | <b>, (III retroperitoneum axillary mesenteric 2A oropharynx) ,</b>                                          |                                | (S4h.6)   |

Note: In Tables S4(c), (d), (g), and (h), regular expressions that group only cardinal numbers as options [e.g. "size (15|20|30|...) mm"] are not shown for brevity.



**Table S5. List of features mined by TEPAPA – other variables**

| Phenotype or variable     | Measure | Est.  | P                     | N  | Pattern                                                                              | Crossref. |
|---------------------------|---------|-------|-----------------------|----|--------------------------------------------------------------------------------------|-----------|
| Gender: Male              | LOR     | 6.62  | $1.7 \times 10^{-13}$ | 69 | “He”                                                                                 | (S5.1)    |
|                           | LOR     | 4.86  | $8.3 \times 10^{-9}$  | 59 | “He (presents attends)? now? (with is had)? (on will require underwent requires)? a” | (S5.2)    |
| Gender: Female            | LOR     | 8.26  | $1.6 \times 10^{-15}$ | 13 | “She is”                                                                             | (S5.3)    |
|                           | LOR     | 7.08  | $1.2 \times 10^{-13}$ | 12 | “She is? (on has)? (been attends presents)? now? with? a”                            | (S5.4)    |
| Age (years)               | AUC     | 0.84  | $2.7 \times 10^{-6}$  | 21 | “at (both the) (left right)? lung”                                                   | (S5.5)    |
|                           | AUC     | 0.85  | $7.6 \times 10^{-6}$  | 18 | “AP (view of the chest erect semierect)? mobile? (film projection)? .”               | (S5.6)    |
|                           | AUC     | 0.75  | 0.00011               | 44 | “chronic”                                                                            | (S5.7)    |
|                           | AUC     | 0.76  | 0.00025               | 22 | “retired”                                                                            | (S5.8)    |
| Laterality: left          | LOR     | 5.36  | $1.5 \times 10^{-8}$  | 16 | “SCC (of involving) the left”                                                        | (S5.9)    |
| Laterality: right         | LOR     | 3.96  | $3.3 \times 10^{-5}$  | 23 | “SCC of the right”                                                                   | (S5.10)   |
| Node: positive            | LOR     | 2.44  | $4.7 \times 10^{-5}$  | 41 | “one of”                                                                             | (S5.11)   |
|                           | LOR     | 2.05  | 0.00029               | 46 | “Metastatic”                                                                         | (S5.12)   |
|                           | LOR     | 2.81  | 0.00049               | 27 | “extranodal”                                                                         | (S5.13)   |
|                           | LOR     | 3.15  | 0.00094               | 20 | “- cT2? (N1 T1 cT4)? (N2b cT3 T3)? (N2c cT1 N2a)? M0”                                | (S5.14)   |
| Node: negative            | LOR     | 6.36  | $1 \times 10^{-15}$   | 21 | “NO M0”                                                                              | (S5.15)   |
|                           | LOR     | 2.98  | $7.3 \times 10^{-5}$  | 11 | “mm thick”                                                                           | (S5.16)   |
|                           | LOR     | 2.79  | 0.00031               | 10 | “There is no lymphadenopathy”                                                        | (S5.17)   |
| Recurrent disease         | LOR     | 4.00  | $1.6 \times 10^{-11}$ | 31 | “recurrent”                                                                          | (S5.18)   |
|                           | LOR     | 3.33  | $2.7 \times 10^{-7}$  | 22 | “is well? known to the unit”                                                         | (S5.19)   |
|                           | LOR     | 3.98  | $5.6 \times 10^{-6}$  | 13 | “recurrent (SCC squamous cell carcinoma)? (of disease in) the”                       | (S5.20)   |
|                           | LOR     | -2.13 | $7.7 \times 10^{-5}$  | 53 | “M0 (, )? (p16 P16)? positive? () disease)? .”                                       | (S5.21)   |
| Tumour site: Lip          | LOR     | 6.96  | $1.3 \times 10^{-5}$  | 3  | “SCC of the lower? lip”                                                              | (S5.22)   |
| Tumour site: Nasal cavity | LOR     | 6.64  | 0.00033               | 2  | “: Labelled " right inferior turbinate " , the specimen consists of”                 | (S5.23)   |
| Tumour site: Oropharynx   | LOR     | 3.45  | $1 \times 10^{-8}$    | 53 | “tongue”                                                                             | (S5.24)   |
|                           | LOR     | 4.16  | $3.3 \times 10^{-7}$  | 33 | “tonsil”                                                                             | (S5.25)   |
|                           | LOR     | 3.67  | $2.7 \times 10^{-5}$  | 26 | “oropharyngeal”                                                                      | (S5.26)   |
| Tumour site: Skin         | LOR     | 5.33  | 0.00013               | 3  | “carcinoma of skin”                                                                  | (S5.27)   |
| Smoking: Current smoker   | LOR     | 4.77  | $1 \times 10^{-9}$    | 17 | “cigarettes”                                                                         | (S5.28)   |
|                           | LOR     | 4.34  | $2.6 \times 10^{-6}$  | 10 | “a (cigarette heavy current) smoker”                                                 | (S5.29)   |
|                           | LOR     | 3.60  | $2.3 \times 10^{-5}$  | 11 | “Inflammatory (pathology scarring in nature changes).”                               | (S5.30)   |
|                           | LOR     | 2.64  | $1.7 \times 10^{-5}$  | 19 | “per day”                                                                            | (S5.31)   |
|                           | LOR     | -3.09 | 0.00011               | 24 | “nonsmoker”                                                                          | (S5.32)   |
|                           | LOR     | 3.46  | $6.1 \times 10^{-6}$  | 26 | “smoker”                                                                             | (S5.33)   |
| Smoking: Ever smoker      | LOR     | 3.18  | $9.8 \times 10^{-5}$  | 23 | “cigarette”                                                                          | (S5.34)   |
|                           | LOR     | 3.09  | 0.00011               | 22 | “consumption”                                                                        | (S5.35)   |
|                           | LOR     | 3.85  | $1.4 \times 10^{-5}$  | 21 | “a reformed? (cigarette heavy current) smoker”                                       | (S5.36)   |
|                           | LOR     | -4.54 | $2.6 \times 10^{-11}$ | 24 | “nonsmoker”                                                                          | (S5.37)   |
| Alcohol: Current user     | LOR     | 3.65  | $6.7 \times 10^{-5}$  | 22 | “g of alcohol? daily .”                                                              | (S5.38)   |
| Alcohol: Never consumed   | LOR     | -5.36 | $3.5 \times 10^{-7}$  | 7  | “is a nonsmoker and? a? nondrinker”                                                  | (S5.39)   |

The rediscovery of these concepts related to categorical clinicopathologic variables can be viewed as “positive controls”. NB: Est. Estimate; LOR: log odds ratios; AUC: area under the ROC curve.

**Table S6. Numeric features mined by TEPAPA**

Rediscovery of concepts related to clinicopathologic variables from the ranked patterns:

| Variable                     | Corpus | $\rho$ | P                     | N  | Pattern                                            | Crossref. |
|------------------------------|--------|--------|-----------------------|----|----------------------------------------------------|-----------|
| Age at diagnosis (years)     | MDT    | 1      | $1.4 \times 10^{-37}$ | 30 | "id : <PATIENTID/> <DATE/><br><NUMBER/> <DOCTOR/>" | (S6.1)    |
|                              | Path   | -0.69  | 0.0029                | 16 | "depth of <NUMBER/> mm"                            | (S6.2)    |
| Alcohol amount (g/day)       | PET    | -0.69  | 0.0087                | 13 | "suv max <NUMBER/>"                                | (S6.3)    |
|                              | MDT    | 1      | $<1 \times 10^{-100}$ | 15 | "<NUMBER/> g of alcohol<br>daily"                  | (S6.4)    |
|                              | MDT    | 1      | $3.4 \times 10^{-51}$ | 7  | "consumes <NUMBER/> g of<br>alcohol daily"         | (S6.5)    |
| Ceased smoking (X years ago) | MDT    | 0.98   | $3.3 \times 10^{-5}$  | 8  | "<NUMBER/> pack"                                   | (S6.6)    |
| Last smoked (X years ago)    | MDT    | 1      | $6.4 \times 10^{-11}$ | 3  | "ceasing <NUMBER/>"                                | (S6.7)    |
| HPV/P16 status*              | PET    | 1      | 0.02                  | 9  | "SUV max <NUMBER/> )<br>localised to the"          | (S6.8)    |
|                              | MDT    | 0.81   | 0.0099                | 24 | "<NUMBER/> cm"                                     | (S6.9)    |
|                              | Path   |        |                       |    | (None discovered)                                  |           |

\* Index phenotype

**Table S7. Relative computational time by pipeline variation (annotation, sequence-level sequence-level annotation, threshold selection methods).**

| Pipeline variations              | Corpus type        |        |                                |        |                          |        |                        |        |                      |        |
|----------------------------------|--------------------|--------|--------------------------------|--------|--------------------------|--------|------------------------|--------|----------------------|--------|
|                                  | MDT reports (N=77) |        | Oncology clinic letters (N=14) |        | Pathology reports (N=75) |        | FDG-PET reports (N=74) |        | All inclusive (N=82) |        |
|                                  | Est.               | P      | Est.                           | P      | Est.                     | P      | Est.                   | P      | Est.                 | P      |
| <b>Mean (<i>x</i> reference)</b> | 2.93               |        | (Ref)                          |        | 12.83                    |        | 5.46                   |        | 51.36                |        |
| <b>Annotation method</b>         |                    |        |                                |        |                          |        |                        |        |                      |        |
| None                             | (Ref.)             |        |                                |        |                          |        |                        |        |                      |        |
| POSTAG                           | 5.64               | <0.001 | 3.04                           | <0.001 | 5.34                     | <0.001 | 2.27                   | <0.001 | NA                   |        |
| SPARSE                           | 2.45               | <0.001 | 1.91                           | <0.001 | 1.17                     | 0.001  | 1.36                   | <0.001 | NA                   |        |
| STEM                             | 2.14               | <0.001 | 2.22                           | <0.001 | 2.11                     | <0.001 | 2.05                   | <0.001 | 2.18                 | <0.001 |
| UMLS                             | 0.89               | 0.012  | 1.50                           | <0.001 | 0.91                     | 0.047  | 0.98                   | 0.405  | 0.94                 | <0.001 |
| <b>Post-progressing</b>          |                    |        |                                |        |                          |        |                        |        |                      |        |
| None                             | (Ref)              |        |                                |        |                          |        |                        |        |                      |        |
| REGEXI                           | 1.07               | 0.013  | 1.06                           | 0.013  | 1.12                     | <0.001 | 1.06                   | <0.001 | 1.02                 | 0.129  |
| <b>Threshold selection</b>       |                    |        |                                |        |                          |        |                        |        |                      |        |
| Dev. opt. thres.                 | 0.99               | 0.259  | 0.99                           | 0.004  | 1.03                     | <0.001 | 1.04                   | <0.001 | 0.99                 | 0.180  |
| <i>Adjusted R<sup>2</sup></i>    | 0.94               |        | 0.87                           |        | 0.92                     |        | 0.92                   |        | 0.94                 |        |

Multiple regression analysis of the factors affecting relative computational time by pipeline variations. NB: Abbreviations: FDG-PET/CT:18F-fluorodeoxyglucose Positron Emission Tomography/ Computed Tomography; MDT: multidisciplinary team; POSTAG: Part-of-speech tagging with word lemmatization; REGEXI: regular expression induction algorithm; SPARSE: syntactic parsing; STEM: token-level annotation by word stemming using Snowball algorithm; UMLS: sequence-level annotation using Meta-thesaurus from the United Medical Language System (UMLS) version 2016 AA.

**Figure S8.** Average predictive performance by classifier and feature filtering threshold

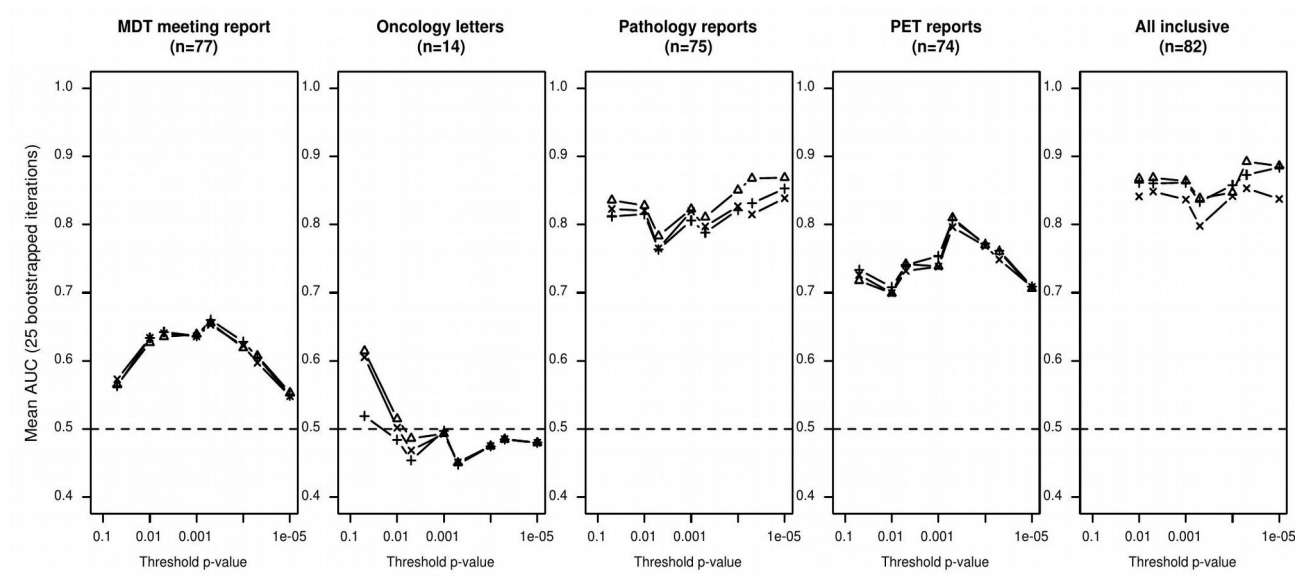

Supplement: 41598_2017_7111_MOESM1_ESM.pdf [file 41598_2017_7111_MOESM1_ESM.pdf]
